# Supplementary material
Source: PubMed Central journal article supplement (PMC5364346)
Supplement: ismej2016163x3.pdf [file ismej2016163x3.pdf]

**Table S1. Strains used in this work.**

| Strain                               | Description                                                           | Reference                             |
|--------------------------------------|-----------------------------------------------------------------------|---------------------------------------|
| <b><i>Enterococcus faecalis</i></b>  |                                                                       |                                       |
| VE14089                              | <i>E. faecalis</i> V583 cured of its plasmids. EfCIV583 positive      | (Rigottier-Gois <i>et al.</i> , 2011) |
| <i>E. faecalis</i> JH2-2             | Laboratory strain                                                     | (Jacob and Hobbs, 1974)               |
| VE18590                              | <i>E. faecalis</i> V583 derivative. Non-lysogenic, EfCIV583-negative. | (Matos <i>et al.</i> 2013)            |
| VE18589                              | VE18590 (EfCIV583)                                                    | (Matos <i>et al.</i> 2013)            |
| JP10318                              | VE14089 EfCIV583 <i>tetM</i>                                          | This work                             |
| JP10416                              | JP10318 $\Delta p1$                                                   | This work                             |
| JP10860                              | JP10318 $\Delta p2$                                                   | This work                             |
| JP10861                              | JP10318 $\Delta p3$                                                   | This work                             |
| JP10862                              | JP10318 $\Delta p4$                                                   | This work                             |
| JP10863                              | JP10318 $\Delta p5$                                                   | This work                             |
| JP10864                              | JP10318 $\Delta p6$                                                   | This work                             |
| JP10984                              | VE 18562 (pp1+)                                                       | (Matos <i>et al.</i> 2013)            |
| JP11211                              | JP10984 $\Delta EF0309$                                               | This work                             |
| JP11028                              | JP10984 EfCIV583 <i>tetM</i>                                          | This work                             |
| JP13142                              | JP11028 $\Delta EF0309$                                               | This work                             |
| <b><i>Bacillus subtilis</i></b>      |                                                                       |                                       |
| <i>B. subtilis</i> RL-3              | Natural competent                                                     | Richard Losick lab                    |
| <b><i>Listeria monocytogenes</i></b> |                                                                       |                                       |
| <i>L. monocytogenes</i> RN10983      | Natural lysogenic strain                                              | Richard Novick lab                    |
| <b><i>Staphylococcus aureus</i></b>  |                                                                       |                                       |
| <i>S. aureus</i> RN4220              | Restriction-defective strain                                          | (Kreiswirth <i>et al.</i> , 1983)     |
| JP8546                               | RN4220 pJP1097                                                        | (Mir-Sanchis <i>et al.</i> , 2012)    |
| JP8545                               | RN4220 pJP1096                                                        | (Mir-Sanchis <i>et al.</i> , 2012)    |
| JP10837                              | RN4220 pJP1350                                                        | This work                             |
| JP10838                              | RN4220 pJP449                                                         | This work                             |
| JP5267                               | RN4220 pJP788                                                         | This work                             |
| JP5266                               | RN4220 pJP787                                                         | This work                             |
| JP9991                               | RN4220 pJP1277                                                        | This work                             |
| JP9992                               | RN4220 pJP1278                                                        | This work                             |
| JP5118                               | RN4220 pJP782                                                         | This work                             |
| RN10733                              | RN4220 pRN9211                                                        | (Ubeda <i>et al.</i> , 2007)          |
| RN10734                              | RN4220 pRN9217                                                        | (Ubeda <i>et al.</i> , 2007)          |
| JP10399                              | RN4220 pJP1316                                                        | This work                             |
| JP10739                              | JP10399 pJP1317                                                       | This work                             |
| JP10740                              | JP10399 pJP1318                                                       | This work                             |

| Strain                              | Description                | Reference                     |
|-------------------------------------|----------------------------|-------------------------------|
| <b><i>Staphylococcus aureus</i></b> |                            |                               |
| JP10822                             | JP10399 pJP1330            | This work                     |
| JP10741                             | JP10399 pJP1319            | This work                     |
| JP10742                             | JP10399 pJP1320            | This work                     |
| JP10743                             | JP10399 pJP1321            | This work                     |
| JP10744                             | JP10399 pJP1322            | This work                     |
| JP10745                             | JP10399 pJP1323            | This work                     |
| JP10746                             | JP10399 pJP1324            | This work                     |
| JP10747                             | JP10399 pJP1325            | This work                     |
| JP10748                             | JP10399 pJP1326            | This work                     |
| JP10749                             | JP10399 pJP1327            | This work                     |
| <b><i>Escherichia coli</i></b>      |                            |                               |
| JP5630                              | DH5 $\alpha$ pJP795/pJP796 | This work                     |
| JP5631                              | DH5 $\alpha$ pJP795/pJP797 | This work                     |
| JP5632                              | DH5 $\alpha$ pJP795/pJP798 | This work                     |
| JP5039                              | DH5 $\alpha$ pJP782        | This work                     |
| JP4994                              | DH5 $\alpha$ pJP781        | This work                     |
| JP9821                              | DH5 $\alpha$ pJP1306       | This work                     |
| JP10488                             | BL21 (DE3) pJP1328         | This work                     |
| <b><i>Lactococcus lactis</i></b>    |                            |                               |
| IL1403                              | Laboratory strain          | (Chopin <i>et al.</i> , 1984) |
| JP14198                             | IL1403 pAGEnt              | This work                     |
| JP14199                             | IL1403 pJP1868             | This work                     |
| JP14203                             | IL1403 pJP1869             | This work                     |

**Table S2. Oligonucleotides used in this work.**

| Plasmid                                          | Oligonucleotides   | Sequence (5'-3')                               |
|--------------------------------------------------|--------------------|------------------------------------------------|
| <b>Excision, circularisation and integration</b> |                    |                                                |
| EfCl <sub>v583</sub><br>Excision                 | EfPI-1m            | TAAAAACAGCGCCTTCGTCC                           |
|                                                  | EfPI-2c            | AATCGAGTAGTAGCTGAAACG                          |
| Circularization                                  | EfPI-8m            | CTTCTTCAATCAGGAGTGCC                           |
|                                                  | EfPI-12c           | TATGGTTGGTACTGATAGGCG                          |
| In/out                                           | EfPI-8m            | CTTCTTCAATCAGGAGTGCC                           |
|                                                  | EfPI-2c            | AATCGAGTAGTAGCTGAAACG                          |
| pJP795                                           | EfCl-int-5mH       | CCCAAGCTTTTGGCTTAAACCAAGAAAAGC                 |
|                                                  | EfCl-int-4cB       | CGCGGATCCATTATGGGTGTTTTAAATGGC                 |
| pJP796                                           | EfCl-int-1mS       | ACGCGTCGACCAGTTATAGAAACATCTCTCC                |
|                                                  | EfCl-int-3cB       | CGCGGATCCAGTGATAATCAGTCAGTTGGC                 |
| pJP797                                           | EfCl-int-1mS       | ACGCGTCGACCAGTTATAGAAACATCTCTCC                |
|                                                  | EfCl-int-4cB       | CGCGGATCCATTATGGGTGTTTTAAATGGC                 |
| pJP798                                           | EfCl-int-2mS       | ACGCGTCGACTGAAACACTTCAAATTATGGC                |
|                                                  | EfCl-int-3cB       | CGCGGATCCAGTGATAATCAGTCAGTTGGC                 |
| pJP1350                                          | SaPIbov-149cB      | CGCGGATCCGATCAGTACCTAAATATGCG                  |
|                                                  | SaPIbov1-243mK     | CGGGGTACCTACGACATTAACGTCATTGCG                 |
| pJP788                                           | EfPI-16mE          | CCGGAATTCGCTTTTTATCAAGCGTATGGC                 |
|                                                  | EfPI-15cB          | CGCGGATCCACATATAGGCGGTTGTACCG                  |
| pJP787                                           | EfPI-16mE          | CCGGAATTCGCTTTTTATCAAGCGTATGGC                 |
|                                                  | EfPI-17cB          | CGCGGATCCCGTGGAATACCTAACTCCTC                  |
| pJP1277                                          | EfPI-56mE          | CCGGAATTCGGAAACGCCCTCTACTATCTTC                |
|                                                  | EfPI-15cB          | CGCGGATCCACATATAGGCGGTTGTACCG                  |
| pJP1278                                          | EfPI-56mE          | CCGGAATTCGGAAACGCCCTCTACTATCTTC                |
|                                                  | EfPI-17cB          | CGCGGATCCCGTGGAATACCTAACTCCTC                  |
| pJP782                                           | EfPI-7mB           | CGCGGATCCAATGACCTCGTGTAAGGCC                   |
|                                                  | EfPI-9cS           | ACGCGTCGACCAATAGAGAATCCGAGATAGC                |
| pJP781                                           | EfPI-6mB           | CGCGGATCCAAGGATTTGGTCGGTTACC                   |
|                                                  | EfPI-9cS           | ACGCGTCGACCAATAGAGAATCCGAGATAGC                |
| pJP1306                                          | EfPI-7mB           | CGCGGATCCAATGACCTCGTGTAAGGCC                   |
|                                                  | EfPI-49c           | GCATTGGGAGATTTTTTCAGC                          |
|                                                  | EfPI-50m           | GCTGAAAAAATCTCCCAATGCCTCTGGTAGGTACTCC<br>ACAAG |
|                                                  | EfPI-9cS           | ACGCGTCGACCAATAGAGAATCCGAGATAGC                |
| pJP1312                                          | EfPI-27mXS         | GCTCTAGAGCACGCGTCGACTGACAACGTTCTCTCT<br>TTCC   |
|                                                  | EfPI-28cB          | CGCGGATCCTCTTAAGGAGTGCTAAAGAGC                 |
|                                                  | EfPI-29mP          | AAAACCTGCAGGAAGCGGAAGATTTTCATGCCG              |
| pJP1313                                          | EfPI-30cE          | CCGGAATTCCTTACTGAGAATCAGGAGAGC                 |
|                                                  | EFV583phi1-3mBgIII | GAAGATCTTTAGGAACACCGCCAGAAACC                  |
|                                                  | EFV583phi1-4cS     | ACGCGTCGACTTTACGACCAGACGAAGAGCC                |

| Plasmid | Oligonucleotides | Sequence (5'-3')                                           |
|---------|------------------|------------------------------------------------------------|
| pJP1351 | EFV583phi2-3mB   | CGCGGATCCTTAGCCGCAGCAAGTAATGCG                             |
|         | EFV583phi2-6m    | ACAGAATAATCCCTAAATTC <del>CCCAAACGATGGCAACGC</del><br>ACAG |
|         | EFV583phi2-5c    | GAATTTAGGGATTATTCTGTG                                      |
|         | EFV583phi2-4cS   | ACGCGTCGACTAAATCCGACATATGGGCAGG                            |
| pJP1352 | EFV583phi3-3mB   | CGCGGATCCAGTTGAAGCTGATGCGGAAGG                             |
|         | EFV583phi3-4cS   | ACGCGTCGACGAAATTTTCGAAAATTCTCCG                            |
| pJP1353 | EFV583phi4-3mB   | CGCGGATCCTTTATGGCAATATGGAAGGAG                             |
|         | EFV583phi4-4cS   | ACGCGTCGACAATTAACAGCGGTTGATAGCC                            |
| pJP1354 | EFV583phi5-3mB   | CGCGGATCCAATACTCAATGCCATATAGGG                             |
|         | EFV583phi5-4cS   | ACGCGTCGACAGCGTTTTGCTAGTAAAGGGC                            |
| pJP1355 | EFV583phi6-3mB   | CGCGGATCCACAGTACGTTTCCACTGTTCGC                            |
|         | EFV583phi6-4cS   | ACGCGTCGACTCCAATACCTTTCCCGATACG                            |
| pJP1552 | EFV583phi1-5mS   | AGCGTCGACTTTGAACTTTGTGGGAATACG                             |
|         | EF0309-5c        | AACCGGTTTTGGCATAACCC                                       |
|         | EF0309-6m        | GGTATGCCAAAACCGGTTAAGAAAAGAAAGGGCGGA<br>TAG                |
|         | EFV583phi1-6cB   | CGCGGATCCTGCCGCTATACGTCTTAATTG                             |
| pJP1316 | EfPI-15cB        | CGCGGATCCACATATAGGCGGTTGTACCG                              |
|         | TT-1cSp          | ACATGCATGCTGTCACTTTGCTTGATATATGAG                          |
| pJP1317 | EFV583phi1-5mS   | ACGCGTCGACTTTGAACTTTGTGGGAATACG                            |
|         | EFV583phi1-6cB   | CGCGGATCCTGCCGCTATACGTCTTAATTG                             |
| pJP1318 | EFV583phi1-7mS   | ACGCGTCGACAATATCTCAATTTATGAGGTGTAC                         |
|         | EFV583phi1-8cB   | CGCGGATCCTGAATCTGCTTCAATATTTAAATAG                         |
| pJP1330 | EFV583phi1-9mS   | ACGCGTCGACAAAGCGATTTTCAATGTAACAGATG                        |
|         | EFV583phi1-10cB  | CGCGGATCCTGAATTTTTTAAAGTAATCACATGG                         |
| pJP1319 | EFV583phi1-11mS  | ACGCGTCGACGAATTCGGAGATACTAATTTTTTATG                       |
|         | EFV583phi1-12cB  | CGCGGATCCTAATTTGATGTTTTTTCTGGCTG                           |
| pJP1320 | EFV583phi1-13mS  | ACGCGTCGACTATCAAGAAGGATGGCTTGAC                            |
|         | EFV583phi1-14cB  | CGCGGATCCTCTTAGAGTATTCCTGATAGGG                            |
| pJP1321 | EFV583phi1-15mS  | ACGCGTCGACAGCAACGTTACATCCCTATCAG                           |
|         | EFV583phi1-16cB  | CGCGGATCCTAATTTTTGATAGCTGACTAACC                           |
| pJP1322 | EFV583phi1-17mS  | ACGCGTCGACATACCGTATGATGTTAGATTTATATTG                      |
|         | EFV583phi1-18cB  | CGCGGATCCGTCTTCACTAAGTAAAGCTTCC                            |
| pJP1323 | EFV583phi1-5mS   | ACGCGTCGACTTTGAACTTTGTGGGAATACG                            |
|         | EFV583phi1-35cB  | CGCGGATCCTTCGACAGCTTCCAGATCAAC                             |
| pJP1324 | EFV583phi1-36mS  | ACGCGTCGACGTTACCGATTATGTGGCTGTG                            |
|         | EFV583phi1-37cB  | CGCGGATCCGCATAATATCCACGCTTCTTG                             |
| pJP1325 | EFV583phi1-38mS  | ACGCGTCGACGTGTTTGTAGTGGTTGTTTCGC                           |
|         | EFV583phi1-39cB  | CGCGGATCCCCTCCTACGGAATTAATCTGT                             |
| pJP1326 | EFV583phi1-40mS  | ACGCGTCGACGTGCTTTAGAAGATAAGAACCG                           |
|         | EFV583phi1-41cB  | CGCGGATCCAATTCACGCTAGCCTTTTG                               |
| pJP1327 | EFV583phi1-42mS  | ACGCGTCGACGATGAACGTTTCCAGAAGCA                             |
|         | EFV583phi1-6cB   | CGCGGATCCTGCCGCTATACGTCTTAATTG                             |

| Plasmid | Oligonucleotides | Sequence (5'-3')                                        |
|---------|------------------|---------------------------------------------------------|
| pJP1328 | EfPI-45mB        | CGCGGATCCGATGAGAAAGGAGTTTCCTCTGATG                      |
|         | EfPI-46cE        | CCGGAATTCATTCATTCTTTAGCTTTTGATTTACG                     |
|         | EF0309-1mS       | ACGCGTCTGACTTCACACAGGAAACAGACCATGCCAAAA<br>CCGGTTAAGGTT |
|         | EF0309-2cP       | AACTGCAGCTATCCGCCCTTTCTTTTCTT                           |
| pJP1868 | bIL286-cos_mP    | TCAGTTCTGCAGATTTTTAATAACCCTCCCCCGTATCT<br>T             |
|         | bIL286-cos_cS    | TCTCTTACTAGTTTTTTCTCCTTTCTTTTAGTGTTTTGAC                |
| pJP1869 | bIL310-cos_mP    | TCAGTTCTGCAGTTTTTAAACACCCCGCCCGTAT                      |
|         | bIL310-cos_cS    | CTTACTAGTTTTTAGATTTTTGACCCCCCTATATAAAAAT                |

| Southern blot     | Oligonucleotides | Sequence (5'-3')                |
|-------------------|------------------|---------------------------------|
| EfCIV583<br>probe | EfPI-29mP        | AAAACCTGCAGGAAGCGGAAGATTCATGCCG |
|                   | EfPI-30cE        | CCGGAATTCCTTACTGAGAATCAGGAGAGC  |
| Phage p1<br>probe | EFV583phi1V-1m   | GTGCCTAAATCATAAGGACGG           |
|                   | EFV583phi1V-2c   | AAAGATTCCGTGCGATTATCC           |

**Table S3. Plasmids used in this work.**

| Plasmid    | Description                                                                                            | Reference                          |
|------------|--------------------------------------------------------------------------------------------------------|------------------------------------|
| pCN41      | Ap <sup>r</sup> . Used in transcriptional fusions to the staphylococcal $\beta$ -lactamase <i>blaZ</i> | (Charpentier <i>et al.</i> , 2004) |
| pCN33      | Ap <sup>r</sup> . Cloning vector                                                                       | (Charpentier <i>et al.</i> , 2004) |
| pCN51      | Ap <sup>r</sup> . Expression vector                                                                    | (Charpentier <i>et al.</i> , 2004) |
| pMAK700    | Cm <sup>r</sup> . Plasmid thermosensitive in <i>E. coli</i>                                            | (Hamilton <i>et al.</i> , 1989)    |
| pMAD       | Vector for efficient allelic replacement                                                               | (Arnaud <i>et al.</i> , 2004)      |
| pCU1       | Cm <sup>r</sup> . Cloning vector                                                                       | (Augustin <i>et al.</i> , 1992)    |
| pPROEX HTa | Expression vector                                                                                      | Invitrogen                         |
| pAGEnt     | Cm <sup>r</sup> . Expression vector                                                                    | (Linares <i>et al.</i> , 2014)     |
| pJP795     | pMAK700 <i>att</i> <sub>C</sub> EfCIV583                                                               | This work                          |
| pJP796     | pCN51 <i>int-att</i> <sub>P1</sub> EfCIV583                                                            | This work                          |
| pJP797     | pCN51 <i>int-att</i> <sub>L</sub> EfCIV583                                                             | This work                          |
| pJP798     | pCN51 $\Delta$ <i>int-att</i> <sub>P1</sub> EfCIV583                                                   | This work                          |
| pJP1097    | pCN41 <i>stl-xis-blaZ</i> SaPIbov1                                                                     | (Mir-Sanchis <i>et al.</i> , 2012) |
| pJP1096    | pCN41 $\Delta$ <i>stl-xis-blaZ</i> SaPIbov1                                                            | (Mir-Sanchis <i>et al.</i> , 2012) |
| pJP1350    | pCN41 <i>stl-hel-blaZ</i> SaPIbov1                                                                     | This work                          |
| pJP449     | pCN41 $\Delta$ <i>stl-hel-blaZ</i> SaPIbov1                                                            | (Ubeda <i>et al.</i> , 2008)       |
| pJP788     | pCN41 <i>stl-xis-blaZ</i> EfCIV583                                                                     | This work                          |
| pJP787     | pCN41 $\Delta$ <i>stl-xis-blaZ</i> EfCIV583                                                            | This work                          |
| pJP1277    | pCN41 <i>stl-hel-blaZ</i> EfCIV583                                                                     | This work                          |
| pJP1278    | pCN41 $\Delta$ <i>stl-hel-blaZ</i> EfCIV583                                                            | This work                          |
| pJP782     | Suicide plasmid. Em <sup>R</sup> $\Delta$ <i>stl-pri-hel-ori</i> EfCIV583                              | This work                          |
| pJP781     | Suicide plasmid. Em <sup>R</sup> $\Delta$ <i>stl-pri-hel-ori</i> EfCIV583                              | This work                          |
| pJP1306    | Suicide plasmid. Em <sup>R</sup> $\Delta$ <i>stl-pri-hel-ori</i> EfCIV583                              | This work                          |
| pRN9211    | Suicide plasmid. Em <sup>R</sup> <i>pri-hel-ori</i> SaPIbov1                                           | (Ubeda <i>et al.</i> , 2007)       |
| pRN9217    | Suicide plasmid. Em <sup>R</sup> <i>pri-hel-ori</i> SaPI1                                              | (Ubeda <i>et al.</i> , 2007)       |
| pJP1312    | pMAD derivative. Insertion of <i>tetM</i> cassette in EfCIV583                                         | This work                          |
| pJP1313    | pMAD derivative. Deletion of phage p1 from VE14089                                                     | This work                          |
| pJP1351    | pMAD derivative. Deletion of phage p2 from VE14089                                                     | This work                          |
| pJP1352    | pMAD derivative. Deletion of phage p3 from VE14089                                                     | This work                          |
| pJP1353    | pMAD derivative. Deletion of phage p4 from VE14089                                                     | This work                          |
| pJP1354    | pMAD derivative. Deletion of phage p5 from VE14089                                                     | This work                          |
| pJP1355    | pMAD derivative. Deletion of phage p6 from VE14089                                                     | This work                          |
| pJP1552    | pMAD derivative. Deletion of EF0309 from V583 p1.                                                      | This work                          |
| pJP1316    | Transcriptional analysis of <i>stl</i> EfCIV583, pCU1 $\beta$ -lactamase <i>blaZ</i>                   | This work                          |
| pJP1317    | Expression of EF0308 to EF0312, pCN51 derivative                                                       | This work                          |
| pJP1318    | Expression of EF0313 to EF0317, pCN51 derivative                                                       | This work                          |
| pJP1330    | Expression of EF0318 to EF0323, pCN51 derivative                                                       | This work                          |
| pJP1319    | Expression of EF0324 to EF0327, pCN51 derivative                                                       | This work                          |
| pJP1320    | Expression of EF0328 to EF0329, pCN51 derivative                                                       | This work                          |
| pJP1321    | Expression of EF0330, pCN51 derivative                                                                 | This work                          |

| Plasmid | Description                                                                      | Reference |
|---------|----------------------------------------------------------------------------------|-----------|
| pJP1322 | Expression of EF0331 to EF0333, pCN51 derivative                                 | This work |
| pJP1323 | Expression of EF0308, pCN51 derivative                                           | This work |
| pJP1324 | Expression of EF0309, pCN51 derivative                                           | This work |
| pJP1325 | Expression of EF0310, pCN51 derivative                                           | This work |
| pJP1326 | Expression of EF0311, pCN51 derivative                                           | This work |
| pJP1327 | Expression of EF0312, pCN51 derivative                                           | This work |
| pJP1328 | Expression in <i>E. coli</i> of His-Stl EfCIV583 + EF0309, pPROEX HTa derivative | This work |
| pJP1868 | pAGEnt containing phage bIL286 <i>cos</i> site                                   | This work |
| pJP1869 | pAGEnt containing LICbIL310 putative <i>cos</i> site                             | This work |

## References

- Arnaud M, Chastanet A, Débarbouillé M. (2004). New vector for efficient allelic replacement in naturally nontransformable, low-GC-content, gram-positive bacteria. *Appl Environ Microbiol* **70**: 6887–6891.
- Augustin J, Rosenstein R, Wieland B, Schneider U, Schnell N, Engelke G, *et al.* (1992). Genetic analysis of epidermin biosynthetic genes and epidermin-negative mutants of *Staphylococcus epidermidis*. *Eur J Biochem* **204**: 1149–1154.
- Charpentier E, Anton AI, Barry P, Alfonso B, Fang Y, Novick RP. (2004). Novel cassette-based shuttle vector system for gram-positive bacteria. *Appl Environ Microbiol* **70**: 6076–6085.
- Chopin A, Chopin MC, Moillo-Batt A, Langella P. (1984). Two plasmid-determined restriction and modification systems in *Streptococcus lactis*. *Plasmid* **11**: 260–263.
- Hamilton CM, Aldea M, Washburn BK, Babitzke P, Kushner SR. (1989). New method for generating deletions and gene replacements in *Escherichia coli*. *J Bacteriol* **171**: 4617–4622.
- Jacob AE, Hobbs SJ. (1974). Conjugal transfer of plasmid-borne multiple antibiotic resistance in *Streptococcus faecalis* var. *zymogenes*. *J Bacteriol* **117**: 360–372.
- Kreiswirth BN, Löfdahl S, Betley MJ, O'Reilly M, Schlievert PM, Bergdoll MS, *et al.* (1983). The toxic shock syndrome exotoxin structural gene is not detectably transmitted by a prophage. *Nature* **305**: 709–712.
- Linares DM, Perez M, Ladero V, del Rio B, Redruello B, Martin MC, *et al.* (2014). An agmatine-inducible system for the expression of recombinant proteins in *Enterococcus faecalis*. *Microb Cell Fact* **13**: 169.
- Mir-Sanchis I, Martínez-Rubio R, Martí M, Chen J, Lasa I, Novick RP, *et al.* (2012). Control of *Staphylococcus aureus* pathogenicity island excision. *Mol Microbiol* **85**: 833–845.
- Rigottier-Gois L, Alberti A, Houel A, Taly J-F, Palcy P, Manson J, *et al.* (2011). Large-scale screening of a targeted *Enterococcus faecalis* mutant library identifies envelope fitness factors. *PLoS ONE* **6**: e29023.
- Ubeda C, Barry P, Penadés JR, Novick RP. (2007). A pathogenicity island replicon in *Staphylococcus aureus* replicates as an unstable plasmid. *Proc Natl Acad Sci USA* **104**: 14182–14188.
- Ubeda C, Maiques E, Barry P, Matthews A, Tormo MA, Lasa I, *et al.* (2008). SaPI mutations affecting replication and transfer and enabling autonomous replication in the absence of helper phage. *Mol Microbiol* **67**: 493–503.

**Table S4. Description and relationships between the *E. faecalis* PIC1 elements<sup>a</sup>.**

| <b>EfCIV583<sup>b</sup></b> | <b>GenBank acces</b> |                | <b>EfCI918</b> | <b>EfCISF105</b> | <b>EfCIB16457</b> | <b>EfCILA3B-2</b> |
|-----------------------------|----------------------|----------------|----------------|------------------|-------------------|-------------------|
| EfCIV583_1                  | EF2955               | <i>int</i>     | 95             | 93               | 100               | 85                |
| EfCIV583_2                  | EF2954               | <i>rpr</i>     |                |                  | 100               | 99                |
| EfCIV583_3                  | not annotated        |                | 85             |                  | 100               | 97                |
| EfCIV583_4                  | EF2953               |                | 90             | 76               | 100               | 83                |
| EfCIV583_5                  | EF2952               |                | 90             |                  | 100               | 99                |
| EfCIV583_6                  | EF2951               |                | 72             | 85               | 99                | 84                |
| EfCIV583_7                  | EF2950               |                | 80             | 80               | 94                | 95                |
| EfCIV583_8                  | EF2949               |                | 80             | 98               | 82                | 82                |
| EfCIV583_9                  | EF2948               | <i>pri-rep</i> |                |                  |                   |                   |
| EfCIV583_10                 | EF2947               |                |                |                  |                   |                   |
| EfCIV583_11                 | not annotated        |                | 83             | 80               | 78                | 77                |
| EfCIV583_12                 | EF2946               |                | 65             | 65               | 65                | 65                |
| EfCIV583_13                 | EF2945               |                | 100            | 100              | 100               | 100               |
| EfCIV583_14                 | EF2944               |                | 94             | 100              | 94                | 91                |
| EfCIV583_15                 | EF2943               |                | 93             | 100              | 93                | 96                |
| EfCIV583_16                 | EF2942               |                | 94             | 99               | 94                | 92                |
| EfCIV583_17                 | EF2941               |                | 88             | 100              | 88                | 100               |
| EfCIV583_18                 | EF2940               |                | 97             | 100              | 97                | 97                |
| EfCIV583_19                 | EF2939               | <i>csp</i>     | 96             | 100              | 96                | 90                |
| EfCIV583_20                 | EF2938               |                | 60             | 100              | 60                |                   |
| EfCIV583_21                 | EF2937               | <i>uvrB</i>    | 100            | 100              | 100               |                   |
| EfCIV583_22                 | EF2936               |                | 97             | 90               | 97                |                   |
| EfCIV583_23                 | I574_00041           |                | 98             | 98               | 98                |                   |

| <b>EfCILA3B-2<sup>b</sup></b> | <b>GenBank acces</b> |                | <b>EfCIV583</b> | <b>EfCI918</b> | <b>EfCISF105</b> | <b>EfCIB16457</b> |
|-------------------------------|----------------------|----------------|-----------------|----------------|------------------|-------------------|
| EfCILA3B-2_1                  | D347_01789           | <i>fic</i>     |                 |                |                  |                   |
| EfCILA3B-2_2                  | D347_01790           | <i>int</i>     | 85              | 84             | 87               | 85                |
| EfCILA3B-2_3                  | D347_01791           | <i>rpr</i>     | 99              |                |                  | 99                |
| EfCILA3B-2_4                  | D347_01792           |                | 97              | 81             |                  | 97                |
| EfCILA3B-2_5                  | D347_01793           |                | 83              | 83             | 70               | 83                |
| EfCILA3B-2_6                  | D347_01794           |                | 99              | 90             |                  | 99                |
| EfCILA3B-2_7                  | D347_01795           |                | 84              | 84             | 84               | 85                |
| EfCILA3B-2_8                  | D347_01796           |                | 95              | 73             | 75               | 94                |
| EfCILA3B-2_9                  | D347_01797           |                | 83              | 90             | 81               | 100               |
| EfCILA3B-2_10                 | D347_01798           | <i>pri-rep</i> |                 | 98             | 97               | 96                |
| EfCILA3B-2_11                 | D347_01799           |                | 80              | 94             | 97               | 95                |
| EfCILA3B-2_12                 | D347_01800           |                | 64              | 64             | 64               | 64                |
| EfCILA3B-2_13                 | D347_01801           |                | 100             | 100            | 100              | 100               |
| EfCILA3B-2_14                 | D347_01802           |                | 91              | 93             | 91               | 93                |
| EfCILA3B-2_15                 | D347_01803           |                | 96              | 92             | 95               | 92                |
| EfCILA3B-2_16                 | D347_01804           |                | 92              | 94             | 91               | 94                |
| EfCILA3B-2_17                 | D347_01805           |                | 100             | 86             | 100              | 86                |
| EfCILA3B-2_18                 | D347_01806           |                | 97              | 97             | 97               | 97                |
| EfCILA3B-2_19                 | D347_01807           | <i>csp</i>     | 88              | 93             | 88               | 93                |
| EfCILA3B-2_20                 | D347_01808           |                |                 |                |                  |                   |



| <b>EfCISF105<sup>b</sup></b> | <b>GenBank acces</b> |                | <b>EfCIV583</b> | <b>EfCI918</b> | <b>EfCILA3B-2</b> | <b>EfCIB16457</b> |
|------------------------------|----------------------|----------------|-----------------|----------------|-------------------|-------------------|
| EfCISF105_1                  | UM9_00916            |                |                 |                |                   |                   |
| EfCISF105_2                  | UM9_00917            | <i>int</i>     | 93              | 92             | 87                | 93                |
| EfCISF105_3                  | UM9_00918            | <i>rpr</i>     |                 |                |                   |                   |
| EfCISF105_4                  | UM9_00919            |                |                 |                |                   |                   |
| EfCISF105_5                  | UM9_00920            |                | 80              | 81             | 71                | 80                |
| EfCISF105_6                  | UM9_00921            |                |                 |                |                   |                   |
| EfCISF105_7                  | UM9_00922            |                | 85              | 83             | 83                | 84                |
| EfCISF105_8                  | UM9_00923            |                | 100             | 98             | 95                | 96                |
| EfCISF105_9                  | UM9_00924            |                | 99              | 79             | 81                | 81                |
| EfCISF105_10                 | UM9_00925            | <i>pri-rep</i> |                 | 97             | 97                | 96                |
| EfCISF105_11                 | UM9_00926            |                | 74              | 92             | 88                | 98                |
| EfCISF105_12                 | UM9_00927            |                | 100             | 100            | 100               | 100               |
| EfCISF105_13                 | UM9_00928            |                | 100             | 94             | 91                | 94                |
| EfCISF105_14                 | UM9_00929            |                | 99              | 93             | 95                | 93                |
| EfCISF105_15                 | UM9_00930            |                | 99              | 93             | 91                | 93                |
| EfCISF105_16                 | UM9_00931            |                | 100             | 86             | 100               | 86                |
| EfCISF105_17                 | UM9_00932            |                | 100             | 97             | 97                | 97                |
| EfCISF105_18                 | UM9_00933            | <i>csp</i>     | 99              | 94             | 94                | 94                |
| EfCISF105_19                 | UM9_00934            |                | 100             | 60             |                   | 60                |
| EfCISF105_20                 | UM9_00935            | <i>uvrB</i>    | 100             | 100            |                   | 100               |
| EfCISF105_21                 | UM9_00936            |                | 99              | 98             |                   | 98                |
| EfCISF105_22                 | UM9_00937            |                | 98              | 97             |                   | 97                |

| <b>EfCIB16457<sup>b</sup></b> | <b>GenBank acces</b> |                | <b>EfCIV583</b> | <b>EfCI918</b> | <b>EfCILA3B-2</b> | <b>EfCISF105</b> |
|-------------------------------|----------------------|----------------|-----------------|----------------|-------------------|------------------|
| EfCIB16457_1                  | Q95_00339            | <i>int</i>     | 100             | 95             | 85                | 93               |
| EfCIB16457_2                  | Q95_00340            | <i>rpr</i>     | 100             |                | 99                |                  |
| EfCIB16457_3                  | Q95_00341            |                | 100             | 100            | 99                |                  |
| EfCIB16457_4                  | Q95_00342            |                | 100             | 94             | 83                | 80               |
| EfCIB16457_5                  | Q95_00343            |                | 100             | 90             | 99                |                  |
| EfCIB16457_6                  | Q95_00344            |                | 99              | 84             | 84                | 84               |
| EfCIB16457_7                  | Q95_00345            |                | 94              | 76             | 94                | 78               |
| EfCIB16457_8                  | Q95_00346            |                | 83              | 90             | 100               | 81               |
| EfCIB16457_9                  | Q95_00347            | <i>pri-rep</i> |                 | 96             | 96                | 96               |
| EfCIB16457_10                 | Q95_00348            |                | 82              | 92             | 84                | 98               |
| EfCIB16457_11                 | Q95_00349            |                | 100             | 100            | 98                | 100              |
| EfCIB16457_12                 | Q95_00350            |                | 94              | 100            | 93                | 94               |
| EfCIB16457_13                 | Q95_00351            |                | 93              | 99             | 92                | 93               |
| EfCIB16457_14                 | Q95_00352            |                | 94              | 100            | 94                | 93               |
| EfCIB16457_15                 | Q95_00353            |                | 91              | 100            | 93                | 91               |
| EfCIB16457_16                 | Q95_00354            |                | 97              | 100            | 97                | 97               |
| EfCIB16457_17                 | Q95_00355            | <i>csp</i>     | 94              | 99             | 93                | 94               |
| EfCIB16457_18                 | Q95_00356            |                | 73              | 99             |                   | 73               |
| EfCIB16457_19                 | Q95_00357            | <i>uvrB</i>    | 100             | 100            |                   | 100              |
| EfCIB16457_20                 | Q95_00358            |                | 90              | 100            |                   | 90               |
| EfCIB16457_21                 | Q95_00359            |                | 98              | 100            |                   | 97               |

| EfCI918 <sup>b</sup> | GenBank acces    |                | EfCIV583 | EfCIB16457 | EfCILA3B-2 | EfCISF105 |
|----------------------|------------------|----------------|----------|------------|------------|-----------|
| EfCI918_1            | HMPREF2097_00609 | <i>int</i>     | 95       | 95         | 84         | 92        |
| EfCI918_2            | HMPREF2097_00610 | <i>rpr</i>     |          |            |            |           |
| EfCI918_3            | HMPREF2097_00611 |                | 67       | 67         | 64         |           |
| EfCI918_4            | HMPREF2097_00612 |                | 99       | 95         | 85         | 82        |
| EfCI918_5            | HMPREF2097_00613 |                | 88       | 88         | 90         |           |
| EfCI918_6            | HMPREF2097_00614 |                | 69       | 69         | 94         | 70        |
| EfCI918_7            | HMPREF2097_00615 |                | 93       | 93         | 93         | 91        |
| EfCI918_8            | HMPREF2097_00616 |                | 98       | 95         | 100        | 98        |
| EfCI918_9            | HMPREF2097_00617 |                | 80       | 90         | 90         | 79        |
| EfCI918_10           | HMPREF2097_00618 | <i>pri-rep</i> |          | 96         | 98         | 97        |
| EfCI918_11           | HMPREF2097_00619 |                | 58       | 78         | 57         | 78        |
| EfCI918_12           | HMPREF2097_00620 |                | 64       | 64         | 64         | 60        |
| EfCI918_13           | HMPREF2097_00621 |                | 100      | 100        | 98         | 100       |
| EfCI918_14           | HMPREF2097_00622 |                | 94       | 100        | 93         | 94        |
| EfCI918_15           | HMPREF2097_00623 |                | 93       | 99         | 92         | 94        |
| EfCI918_16           | HMPREF2097_00624 |                | 94       | 100        | 94         | 93        |
| EfCI918_17           | HMPREF2097_00625 |                | 91       | 100        | 91         | 91        |
| EfCI918_18           | HMPREF2097_00626 |                | 97       | 100        | 97         | 97        |
| EfCI918_19           | HMPREF2097_00627 | <i>csp</i>     | 94       | 99         | 93         | 94        |
| EfCI918_20           | HMPREF2097_00628 |                |          | 100        |            |           |
| EfCI918_21           | HMPREF2097_00629 |                | 55       | 100        |            | 55        |
| EfCI918_22           | HMPREF2097_00630 | <i>uvrB</i>    | 100      | 100        |            | 100       |
| EfCI918_23           | HMPREF2097_00631 |                | 91       | 100        |            | 91        |
| EfCI918_24           | HMPREF2097_00632 |                | 98       | 100        |            | 97        |

<sup>a</sup>PICI similarities were determined with BLASTX. Shading: light grey, >90 % similarity to corresponding gene in the PICI element described in the left column; dark grey, 50–90 %; black, <50 %; white, no corresponding gene. Abbreviations: *int*, integrase; *rpr*, PICI repressor; *pri-rep*, primase-helicase homologues; *csp*, cold-shock protein.

<sup>b</sup>We have annotated genes in the PICIs according to the following nomenclature: *PICI\_ORF number*.

Table S5. EfCIV583 orthologies.

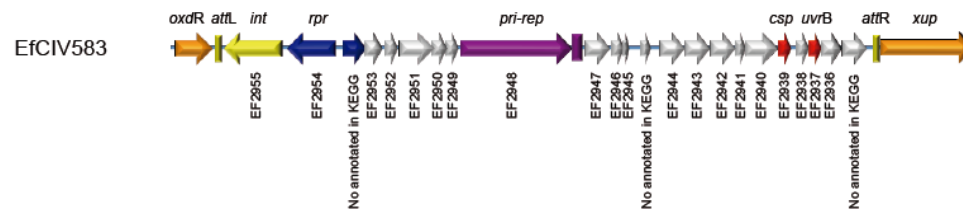

| EfCIV583 gene | Function | Orthologs            | Species                              | Length | Similarity (aa) | Overlap | Element                | Start | End   | Size (kb) | Comments                                                                                |
|---------------|----------|----------------------|--------------------------------------|--------|-----------------|---------|------------------------|-------|-------|-----------|-----------------------------------------------------------------------------------------|
| EF2936        |          | efa:EF2936           | <i>Enterococcus faecalis</i>         | 112    |                 |         | EfCIV583               |       |       |           | No matches in database (DB)                                                             |
| EF2937        |          | efa:EF2937           | <i>Enterococcus faecalis</i>         | 69     | 1.000           | 69      | EfCIV583               |       |       |           |                                                                                         |
|               |          | efq:DR75_2900        | <i>Enterococcus faecalis</i>         | 69     | 0.492           | 59      | No insert              |       |       |           |                                                                                         |
|               |          | efl:EF62_pB0056      | <i>Enterococcus faecalis</i>         | 69     | 0.475           | 59      | PICI                   | 39611 | 46683 | 17.0      |                                                                                         |
|               |          | lpk:LACPI_0388       | <i>Lactococcus piscium</i>           | 59     | 0.475           | 59      | No insert <sup>a</sup> |       |       |           |                                                                                         |
|               |          | lrg:LRHM_0140        | <i>Lactobacillus rhamnosus</i>       | 69     | 0.491           | 57      | No insert              |       |       |           |                                                                                         |
|               |          | lrh:LGG_00140        | <i>Lactobacillus rhamnosus</i>       | 68     | 0.491           | 57      | No insert              |       |       |           |                                                                                         |
|               |          | lcl:LOCK919_0751     | <i>Lactobacillus casei</i>           | 66     | 0.439           | 57      | No insert              |       |       |           |                                                                                         |
|               |          | lcz:LCAZH_0582       | <i>Lactobacillus casei</i>           | 66     | 0.439           | 57      | No insert              |       |       |           |                                                                                         |
|               |          | lpb:SH83_03640       | <i>Lactobacillus plantarum</i>       | 66     | 0.368           | 57      | No insert              |       |       |           |                                                                                         |
|               |          | lpj:JDM1_0749        | <i>Lactobacillus plantarum</i>       | 66     | 0.368           | 57      | No insert              |       |       |           |                                                                                         |
|               |          | lpl:lp_0899          | <i>Lactobacillus plantarum</i>       | 66     | 0.368           | 57      | No insert              |       |       |           |                                                                                         |
| EF2938        |          | efa:EF2938           | <i>Enterococcus faecalis</i>         | 92     |                 |         | EfCIV583               |       |       |           | No match in enterococci; no match in DB with less than 2x MW & over 35% similarity      |
| EF2939        |          | efa:EF2939           | <i>Enterococcus faecalis</i>         | 67     |                 |         | EfCIV583               |       |       |           | Cold-shock protein, has many matches in different species, none in any inserted element |
| EF2940        |          | efa:EF2940           | <i>Enterococcus faecalis</i>         | 190    |                 |         | EfCIV583               |       |       |           | No significant match in DB                                                              |
| EF2941        |          | efa:EF2941           | <i>Enterococcus faecalis</i>         | 65     | 1.000           | 65      | EfCIV583               |       |       |           |                                                                                         |
|               |          | spu:576079           | <i>Strongylocentrotus purpuratus</i> | 297    | 0.358           | 67      | No insert              |       |       |           |                                                                                         |
|               |          | wse:WALSEDRAFT_57668 | <i>Wallemia sebi</i>                 | 491    | 0.391           | 64      | No insert              |       |       |           |                                                                                         |
|               |          | bdi:100822641        | <i>Brachypodium distachyon</i>       | 1101   | 0.381           | 63      | No insert              |       |       |           |                                                                                         |
|               |          | ath:AT1G10490        | <i>Arabidopsis thaliana</i>          | 1028   | 0.413           | 63      | No insert              |       |       |           |                                                                                         |

| EfCIV583 gene | Function       | Orthologs              | Species                          | Lenght | Similarity | Overlap | Element   | Start   | End     | Size (kb) | Comments                                            |
|---------------|----------------|------------------------|----------------------------------|--------|------------|---------|-----------|---------|---------|-----------|-----------------------------------------------------|
|               |                | ...                    |                                  |        |            |         |           |         |         |           |                                                     |
|               |                | wci:WS105_0618         | <i>Weissella ceti</i>            | 74     | 0.429      | 49      | Prophage  |         |         |           |                                                     |
|               |                | wct:WS74_0819          | <i>Weissella ceti</i>            | 74     | 0.429      | 49      | Prophage  |         |         |           |                                                     |
| EF2942        |                | efa:EF2942             | <i>Enterococcus faecalis</i>     | 185    |            |         | EfCIV583  |         |         |           | No match in enterococci; no significant match in DB |
| EF2943        |                | efa:EF2943             | <i>Enterococcus faecalis</i>     | 177    |            |         | EfCIV583  |         |         |           | No match in enterococci; no significant match in DB |
| EF2944        |                | efa:EF2944             | <i>Enterococcus faecalis</i>     | 160    |            |         | EfCIV583  |         |         |           | No match in enterococci; no significant match in DB |
| EF2945        |                | efa:EF2945             | <i>Enterococcus faecalis</i>     | 46     |            |         | EfCIV583  |         |         |           | No match in DB                                      |
| EF2946        |                | efa:EF2946             | <i>Enterococcus faecalis</i>     | 47     |            |         | EfCIV583  |         |         |           | No match in DB                                      |
| EF2947        |                | efa:EF2947             | <i>Enterococcus faecalis</i>     | 136    | 1.000      | 136     | EfCIV583  |         |         |           |                                                     |
|               |                | efc:FAU004_02137       | <i>Enterococcus faecium</i>      | 135    | 0.406      | 128     | PICI      | 2159624 | 2173033 | 13.4      | Has full capsid module                              |
|               |                | efu:HMPREF0351_12135   | <i>Enterococcus faecium</i>      | 135    | 0.406      | 128     | PICI      |         |         |           | Has full capsid module                              |
|               |                | pper:PRUPE_ppa005581mg | <i>Prunus persica</i>            | 453    | 0.302      | 96      | No insert |         |         |           |                                                     |
|               |                | cts:Ctha_2453          | <i>Chloroherpeton thalassium</i> | 755    | 0.333      | 66      | No insert |         |         |           |                                                     |
| EF2948        | <i>pri-rep</i> | efa:EF2948             | <i>Enterococcus faecalis</i>     | 794    | 1.000      | 794     | EfCIV583  |         |         |           |                                                     |
|               |                | lmoc:LMOSLCC5850_1262  | <i>Listeria monocytogenes</i>    | 780    | 0.585      | 482     | Prophage  |         |         |           |                                                     |
|               |                | lmod:LMON_1266         | <i>Listeria monocytogenes</i>    | 780    | 0.585      | 482     | Prophage  |         |         |           |                                                     |
|               |                | lmow:AX10_00090        | <i>Listeria monocytogenes</i>    | 780    | 0.585      | 482     | Prophage  |         |         |           |                                                     |
|               |                | lwe:lwe1216            | <i>Listeria welshimeri</i>       | 780    | 0.585      | 482     | Prophage  |         |         |           |                                                     |
|               |                | saa:SAUSA300_0809      | <i>Staphylococcus aureus</i>     | 790    | 0.449      | 637     | SaPI      | 881996  | 895129  | 13.1      |                                                     |
|               |                | sau:AZ30_04285         | <i>Staphylococcus aureus</i>     | 790    | 0.449      | 637     | SaPI      |         |         |           |                                                     |
|               |                | sax:USA300HOU_0861     | <i>Staphylococcus aureus</i>     | 790    | 0.449      | 637     | SaPI      |         |         |           |                                                     |
|               |                | bthu:YBT1518_01285 pu  | <i>Bacillus thuringiensis</i>    | 797    | 0.532      | 477     | Prophage  |         |         |           |                                                     |
| EF2949        |                | efa:EF2949             | <i>Enterococcus faecalis</i>     | 82     |            |         | EfCIV583  |         |         |           | No significant match in DB                          |

| EfCIV583 gene | Function       | Orthologs               | Species                               | Length | Similarity | Overlap  | Element          | Start   | End     | Size (kb)       | Comments                                           |
|---------------|----------------|-------------------------|---------------------------------------|--------|------------|----------|------------------|---------|---------|-----------------|----------------------------------------------------|
| EF2950        |                | efa:EF2950              | <i>Enterococcus faecalis</i>          | 97     | 1.000      | 97       | EfCIV583         |         |         |                 |                                                    |
|               |                | efc:EFAU004_02141       | <i>Enterococcus faecium</i>           | 52     | 0.396      | 48       | PICI             | 2159624 | 2174178 | 14.5            | Has full capsid module                             |
|               |                | efu:HMPREF0351_12139    | <i>Enterococcus faecium</i>           | 52     | 0.396      | 48       | PICI             |         |         |                 | Has full capsid module                             |
|               |                | efd:EFD32_1868          | <i>Enterococcus faecalis</i>          | 84     | 0.333      | 72       | defective phage? |         |         | 3.2             |                                                    |
|               |                | cpae:CPAST_c11890       | <i>Clostridium pasteurianum</i>       | 398    | 0.457      | 46       | No insert        |         |         |                 |                                                    |
|               |                | gmx:100776868           | <i>Glycine max (soybean)</i>          | 922    | 0.322      | 90       | No insert        |         |         |                 |                                                    |
| EF2951        |                | efa:EF2951              | <i>Enterococcus faecalis</i>          | 221    | 1.000      | 221      | EfCIV583         |         |         |                 | No match in enterococci                            |
|               |                | ppen:T256_00520         | <i>Pediococcus pentosaceus</i>        | 234    | 0.471      | 227      | PICI             | 99518   | 111337  | 11.8            |                                                    |
|               |                | lbh:Lbuc_0024           | <i>Lactobacillus buchneri</i>         | 232    | 0.416      | 219      | PICI             | 24658   | 40308   | 15.6            |                                                    |
|               |                | cpas:Clopa_0076         | <i>Clostridium pasteurianum</i>       | 225    | 0.420      | 207      | PICI             | 76442   | 85886   | 9.4             | Defective                                          |
|               |                | std:SPPN_01200          | <i>Streptococcus pseudopneumoniae</i> | 209    | 0.421      | 202      | PICI             | 190041  | 202462  | 12.4            | Defective                                          |
|               |                | lbk:LVISKB_0740         | <i>Lactobacillus brevis</i>           | 225    | 0.392      | 222      | PICI             | 765893  | 774063  | 8.1             | Defective                                          |
|               |                | smb:smi_2013            | <i>Streptococcus mitis</i>            | 208    | 0.408      | 201      | PICI             | 2057587 | 2068441 | 10.9            |                                                    |
|               |                | snc:HMPREF0837_10280    | <i>Streptococcus pneumoniae</i>       | 201    | 0.399      | 203      | PICI             | 249288  | 267373  | 18.1            |                                                    |
|               |                | snd:MY_0022             | <i>Streptococcus pneumoniae</i>       | 201    | 0.399      | 203      | PICI             |         |         |                 | Defective                                          |
|               |                | snt:SPT_0025            | <i>Streptococcus pneumoniae</i>       | 201    | 0.399      | 203      | PICI             |         |         |                 | Defective                                          |
|               |                | ssut:TL13_0174          | <i>Streptococcus suis</i>             | 206    | 0.391      | 202      | PICI             | 131344  | 143429  | 12.1            |                                                    |
| EF2952        |                | efa:EF2952              | <i>Enterococcus faecalis</i>          | 82     |            |          | EfCIV583         |         |         |                 | No matches in DB                                   |
| EF2953        |                | efa:EF2953              | <i>Enterococcus faecalis</i>          | 105    | 1.000      | 105      | EfCIV583         |         |         |                 |                                                    |
|               |                | xne:XNC1_0454           | <i>Xenorhabdus nematophila</i>        | 313    | 0.300      | 100      | No insert        |         |         |                 |                                                    |
|               |                | xnm:XNC2_0444           | <i>Xenorhabdus nematophila</i>        | 313    | 0.300      | 100      | No insert        |         |         |                 |                                                    |
|               |                | rca:Rcas_1163           | <i>Roseiflexus castenholzii</i>       | 325    | 0.323      | 93       | No insert        |         |         |                 |                                                    |
|               |                | gca:Galf_2037           | <i>Gallionella capsiferriformans</i>  | 79     | 0.316      | 76       | PICI             | 2192302 | 2211152 | 18.8            | Integrase backwards, no transcriptional divergence |
|               |                | ...                     |                                       |        |            |          |                  |         |         |                 |                                                    |
|               |                | efd:EFD32_2452          | <i>Enterococcus faecalis</i>          | 89     | 0.306      | 72       | Prophage         | 2470933 | 2506883 | 36.0            |                                                    |
|               | elo:EC042_2423 | <i>Escherichia coli</i> | 63                                    | 0.333  | 54         | Prophage | 2552120          | 2559893 | 7.8     | Defective phage |                                                    |

| EfCIV583 gene | Function   | Orthologs            | Species                                     | Length | Similarity | Overlap | Element        | Start | End | Size (kb) | Comments                      |
|---------------|------------|----------------------|---------------------------------------------|--------|------------|---------|----------------|-------|-----|-----------|-------------------------------|
| EF2954        | <i>rpr</i> | efa:EF2954           | <i>Enterococcus faecalis</i>                | 316    | 1.000      | 316     | EfCIV583       |       |     |           | No close match in enterococci |
|               |            | scp:HMPREF0833_11008 | <i>Streptococcus parasanguinis</i>          | 175    | 0.398      | 118     | No insert      |       |     |           |                               |
|               |            | rto:RTO_22090        | <i>Ruminococcus torques</i>                 | 138    | 0.400      | 110     | No insert      |       |     |           |                               |
|               |            | ssui:T15_0899        | <i>Streptococcus suis</i>                   | 182    | 0.412      | 102     | PICI           |       |     |           |                               |
|               |            | csc:Czac_2097        | <i>Caldicellulosiruptor saccharolyticus</i> | 211    | 0.318      | 198     | No insert      |       |     |           |                               |
|               |            | lam:LA2_03865        | <i>Lactobacillus amylovorus</i>             | 147    | 0.540      | 63      | No insert      |       |     |           |                               |
|               |            | lay:LAB52_03720      | <i>Lactobacillus amylovorus</i>             | 241    | 0.507      | 71      | No insert      |       |     |           |                               |
| EF2955        | <i>int</i> | efa:EF2955           | <i>Enterococcus faecalis</i>                | 381    | 1.000      | 381     | EfCIV583       |       |     |           |                               |
|               |            | efau:EFAU085_00503   | <i>Enterococcus faecium</i>                 | 393    | 0.467      | 379     | Genomic island |       |     |           |                               |
|               |            | efc:EFAU004_00565    | <i>Enterococcus faecium</i>                 | 393    | 0.467      | 379     | Genomic island |       |     |           |                               |
|               |            | efl:EF62_2611        | <i>Enterococcus faecalis</i>                | 380    | 0.467      | 379     | Genomic island |       |     |           |                               |
|               |            | efu:HMPREF0351_10594 | <i>Enterococcus faecium</i>                 | 393    | 0.467      | 379     | Genomic island |       |     |           |                               |
|               |            | ehr:EHR_01850        | <i>Enterococcus hirae</i>                   | 380    | 0.467      | 379     |                |       |     |           |                               |
|               |            | efq:DR75_1138        | <i>Enterococcus faecalis</i>                | 380    | 0.464      | 379     | Genomic island |       |     |           |                               |
|               |            | ecas:ECBG_01612      | <i>Enterococcus casseliflavus</i>           | 380    | 0.488      | 381     |                |       |     |           |                               |
|               |            | crn:CAR_c08850       | <i>Carnobacterium</i> sp                    | 382    | 0.448      | 384     | Genomic island |       |     |           |                               |

<sup>a</sup>No insert: The ortholog seems to be chromosomally encoded, not been part of a defined mobile element.

**Table S6. Orthology analysis of the 22 ORFs of LIC1CV56-1**

**Abbreviations**

|                                |                                                  |                                                      |
|--------------------------------|--------------------------------------------------|------------------------------------------------------|
| ll - <i>Lactococcus lactis</i> | cbr - <i>Cenorhabditis elegans</i>               | lga - <i>Lactobacillus gasseri</i> ATCC 33323        |
| lla: IL1403                    | cat - <i>Croceibacter atlanticus</i>             | lmc - <i>Listeria monocytogenes</i> Clip81459        |
| llc: SK11                      | cdf - <i>Peptoclostridium difficile</i> 630      | lcn - <i>Leuconostoc carnosum</i>                    |
| lld: KLDS                      | ckl - <i>Clostridium kluyveri</i> DSM 555        | loa - <i>Loa loa</i> (eye worm)                      |
| lli: UC509.9                   | cso - <i>Clostridium cf. saccharolyticum</i> K10 | lgr - <i>Lactococcus garveae</i> ATCC 49156          |
| llm:MG1363                     | efq - <i>E. faecalis</i> ATCC 29212              | lgv - <i>Lactococcus garveae</i> Lg2                 |
| lln: NZ9000                    | ehr - <i>E. hirae</i>                            | mar - <i>Microcystis aeruginosa</i>                  |
| llr: A76                       | efm - <i>Enterococcus faecium</i> NRRL B-2354    | mtr - <i>Meleagris gallopavo</i> (turkey): 100539070 |
| lls: IO-1                      | ere - <i>Eubacterium rectale</i> ATCC 33656      | myr - <i>Myroides sp.</i> A21                        |
| llk: KF147                     | evi - <i>Echinicola vietnamensis</i>             | mer - <i>Methanomassiliicoccus sp. Mx1-Issoire</i>   |
| llt: CV56                      | lpl - <i>Lactobacillus plantarum</i> WCFS1       | smb - <i>S. mitis</i> B                              |
| llw: KW2                       | lcb - <i>Lactobacillus casei</i>                 | stk - <i>S. parauberis</i>                           |
| llx:NCDO2118                   | lpg - <i>Lactobacillus paracasei</i> N1115       | snu - <i>S. pneumoniae</i> A45                       |
|                                | lca - <i>Lactobacillus casei</i> ATCC 334        | stx - <i>S. pyogenes</i> MGAS1882                    |

**Orthologies**

| Gene             |             | length | sim   | OL  | insert   | start   | end     | size (kb) | comment                        |
|------------------|-------------|--------|-------|-----|----------|---------|---------|-----------|--------------------------------|
| llt:CVCAS_0027a* | <i>ltrC</i> | 107    | 1.000 | 107 | PICI     | 36265   | 50942   | 14.7      |                                |
| lla:L35519       |             | 107    | 1.000 | 107 | PICI     | 35516   | 50948   | 15.4      |                                |
| llm:llmg_2538    |             | 107    | 0.897 | 107 | PICI     | 2478636 | 2491949 | 13.3      |                                |
| lln:LLNZ_13110   |             | 107    | 0.897 | 107 | PICI     | 2479452 | 2492765 | 13.3      |                                |
| lld:P620_13395   |             | 106    | 0.796 | 98  | PICI     | 2530163 | 2544289 | 14.2      |                                |
| lls:lilo_1806    |             | 111    | 0.698 | 96  | PICI     | 1963199 | 1976945 | 13.7      |                                |
| myr:MYRA21_3441  |             | 179    | 0.344 | 64  | NI**     |         |         |           |                                |
| llt:CVCAS_0027b* | <i>HP</i>   | 136    | 1.000 | 136 | PICI     | 36265   | 50942   | 14.7      |                                |
| lla:L35867       |             | 136    | 1.000 | 136 | PICI     | 35516   | 50948   | 15.4      |                                |
| llm:llmg_2537    |             | 136    | 0.949 | 136 | PICI     | 2478636 | 2491949 | 13.3      |                                |
| lln:LLNZ_13105   |             | 136    | 0.949 | 136 | PICI     | 2479452 | 2492765 | 13.3      |                                |
| llc:LACR_2255    |             | 136    | 0.904 | 136 | PICI     | 2111920 | 2125925 | 14.0      |                                |
| :llh_11410       |             | 136    | 0.904 | 136 | PICI     | 2111920 | 2125925 | 14.0      |                                |
| lgr:LCGT_1117    |             | 140    | 0.530 | 132 | Prophage | 1109676 | 1146622 | 36.9      |                                |
| lgv :LCGL_1137   |             | 140    | 0.530 | 132 | Prophage |         |         |           |                                |
| lld:P620_10790   |             | 140    | 0.534 | 133 | Prophage | 2078353 | 2118530 | 40.2      |                                |
| llt:CVCAS_0027   | <i>ters</i> | 147    | 1.000 | 147 | PICI     | 36265   | 50942   | 14.7      |                                |
| lla:L36274       |             | 147    | 1.000 | 147 | PICI     | 35516   | 50948   | 15.4      |                                |
| llc:LACR_2256    |             | 147    | 0.959 | 147 | PICI     | 2111920 | 2125925 | 14.0      |                                |
| llr:llh_11415    |             | 147    | 0.959 | 147 | PICI     | 2111920 | 2125925 | 14.0      |                                |
| llm:llmg_2250    |             | 146    | 0.938 | 146 | PICI     | 2211673 | 2228382 | 16.7      | Has phage resistance           |
| lln:llnZ_11610   |             | 146    | 0.938 | 146 | PICI     | 2211673 | 2228382 | 16.7      | Has phage resistance           |
| lga:LGAS_0603    |             | 173    | 0.550 | 120 | Prophage | 600763  | 680457  | 79.7      | Probably 2 prophages in tandem |
| lpl:lp_2423      |             | 169    | 0.530 | 115 | Prophage | 2163938 | 2203818 | 39.9      |                                |
| llt:CVCAS_0028   | <i>HP</i>   | 193    | 1.000 | 193 | PICI     | 36265   | 50942   | 14.7      |                                |
| lla:L36850       |             | 193    | 0.995 | 193 | PICI     | 35516   | 50948   | 15.4      |                                |
| llm:llmg_0029    |             | 193    | 0.902 | 193 | PICI     | 32974   | 51647   | 18.7      |                                |
| lln:llnZ_00140   |             | 193    | 0.902 | 193 | PICI     | 32974   | 51647   | 18.7      |                                |
| llc:LACR_2257    |             | 180    | 0.631 | 179 | PICI     | 2116658 | 2128806 | 12.1      |                                |
| llr:llh_11420    |             | 180    | 0.631 | 179 | PICI     | 2111920 | 2125925 | 14.0      |                                |

| Gene              |     | length | sim   | OL  | insert   | start   | end     | size | comment                                         |
|-------------------|-----|--------|-------|-----|----------|---------|---------|------|-------------------------------------------------|
| llk:llkF_2464     |     | 179    | 0.609 | 179 | PICI     | 2505047 | 2520783 | 15.7 |                                                 |
| lld:P620_02915    |     | 133    | 0.568 | 139 | PICI     | 527748  | 537492  | 9.7  | Defective; has prohead protease                 |
| lgr:LCGT_1791     |     | 287    | 0.328 | 125 | PICI     | 175594  | 178604  | 12.7 | Has phage protease                              |
| lgv:LCGL_1812     |     | 287    | 0.328 | 125 | PICI     | 175594  | 178604  | 12.7 | Has phage protease                              |
| Mtr:mgr           |     | 1527   | 0.272 | 173 | NI       |         |         |      |                                                 |
| llt:CVCAS_0029    | rep | 542    | 1.000 | 542 | PICI     | 36265   | 50942   | 14.7 |                                                 |
| lla:L37667        |     | 542    | 1.000 | 542 | PICI     | 35516   | 50948   | 15.4 |                                                 |
| llm:llmg_0030     |     | 542    | 0.985 | 542 | PICI     | 32974   | 51647   | 18.7 |                                                 |
| lln:llnZ_00145    |     | 542    | 0.985 | 542 | PICI     | 32974   | 51647   | 18.7 |                                                 |
| lld:P620_13370    |     | 542    | 0.954 | 542 | PICI     | 2530163 | 2544289 | 14.2 |                                                 |
| llk:llkF_2463     |     | 542    | 0.941 | 542 | PICI     | 2505047 | 2520783 | 15.7 |                                                 |
| llr:llh_12835     |     | 544    | 0.930 | 542 | PICI     | 2352357 | 2368410 | 16.0 |                                                 |
| llc:LACR_2258     |     | 542    | 0.917 | 542 | PICI     | 2111920 | 2125925 | 14.0 |                                                 |
| llw:kw2_1828      |     | 487    | 0.495 | 489 | Prophage | 1878501 | 1919139 | 40.6 |                                                 |
| smb:smi_0425      |     | 534    | 0.458 | 509 | Prophage | 398225  | 440170  | 41.9 |                                                 |
| stx:MGAS1882_1149 |     | 491    | 0.452 | 489 | Prophage | 1099359 | 1143106 | 46.7 |                                                 |
| llt:CVCAS_0030    | pri | 264    | 1.000 | 264 | PICI     | 36265   | 50942   | 14.7 |                                                 |
| lla:L39306        |     | 264    | 1.000 | 264 | PICI     | 35516   | 50948   | 15.4 |                                                 |
| llc:LACR_2259     |     | 264    | 0.962 | 264 | PICI     | 2111920 | 2125925 | 14.0 |                                                 |
| llm:llmg_2253     |     | 264    | 0.958 | 264 | PICI     | 2211673 | 2228382 | 16.7 | Has phage resistance                            |
| lln:llnZ_11625    |     | 264    | 0.958 | 264 | PICI     | 2211673 | 2228382 | 16.7 | Has phage resistance                            |
| llr:llh_11430     |     | 264    | 0.951 | 264 | PICI     | 2111920 | 2125925 | 14.0 |                                                 |
| llk:llkF_2462     |     | 264    | 0.920 | 264 | PICI     | 2505047 | 2520783 | 15.7 |                                                 |
| lld:P620_11530    |     | 264    | 0.917 | 264 | PICI     | 2217535 | 2230575 | 13.0 |                                                 |
| lcb:LCABL_30870   |     | 273    | 0.323 | 266 | Hybrid   | 3030347 | 3044256 | 13.9 | PICI-prophage hybrid, with entire capsid module |
| llt:CVCAS_0031    | HP  | 109    | 1.000 | 109 | PICI     | 36265   | 50942   | 14.7 |                                                 |
| lla:L40104        |     | 109    | 1.000 | 109 | PICI     | 35516   | 50948   | 14.4 |                                                 |
| llm:llmg_2532     |     | 109    | 0.954 | 109 | PICI     | 2478636 | 2491949 | 13.3 |                                                 |
| lln:llnZ_13075    |     | 109    | 0.954 | 109 | PICI     | 2479452 | 2492765 | 13.3 |                                                 |
| llr:llh_11435     |     | 111    | 0.963 | 108 | PICI     | 2111920 | 2125925 | 14.0 |                                                 |
| lld:P620_11535    |     | 109    | 0.944 | 108 | PICI     | 2217535 | 2230575 | 13.0 |                                                 |
| llk:llkF_2461     |     | 109    | 0.917 | 109 | PICI     | 2505047 | 2520783 | 15.7 |                                                 |
| llc:LACR_2260     |     | 111    | 0.907 | 108 | PICI     | 2116658 | 2128806 | 12.1 |                                                 |
| lgr:LCGT_1789     |     | 109    | 0.562 | 105 | PICI     | 175594  | 178604  | 12.7 | Has phage protease                              |
| lgv:LCGL_1810     |     | 109    | 0.562 | 105 | PICI     | 75594   | 178604  | 12.7 | Has phage protease                              |
| stk:STP_1275      |     | 115    | 0.321 | 81  | Prophage | 1375102 | 1412591 | 37.5 |                                                 |
| llt:CVCAS_0032    | HP  | 64     | 1.000 | 64  | PICI     | 36265   | 50942   | 14.7 |                                                 |
| lla:L200001       |     | 64     | 1.000 | 64  | PICI     | 35516   | 50948   | 14.4 |                                                 |
| llk:llkF_2460     |     | 64     | 0.969 | 64  | PICI     | 2505047 | 2520583 | 15.0 |                                                 |
| lld:P620_02875    |     | 64     | 0.953 | 64  | Hybrid   | 521256  | 537492  | 16.2 | Has 2 integrases                                |
| llr:llh_12820     |     | 104    | 0.344 | 61  | PICI     | 2352357 | 2368410 | 16.0 |                                                 |
| llt:CVCAS_0033    | HP  | 79     | 1.000 | 79  | PICI     | 36265   | 50942   | 14.7 |                                                 |
| lla:L40862        |     | 79     | 0.987 | 79  | PICI     | 35516   | 50948   | 14.4 |                                                 |
| lld:P620_11550    |     | 79     | 0.949 | 79  | PICI     | 2217535 | 2230575 | 13.0 |                                                 |
| llk:llkF_2458     |     | 79     | 0.924 | 79  | PICI     | 2505047 | 2520583 | 15.0 |                                                 |
| llc:LACR_2262     |     | 79     | 0.924 | 79  | PICI     | 2116658 | 2128806 | 12.2 |                                                 |
| llm:llmg_0034     |     | 79     | 0.911 | 79  | PICI     | 32974   | 51647   | 18.6 |                                                 |
| lln:llnZ_00165    |     | 79     | 0.911 | 79  | PICI     | 32974   | 51647   | 18.6 |                                                 |
| llr:llh_11440     |     | 79     | 0.848 | 79  | PICI     | 2111920 | 2125925 | 14.0 |                                                 |
| lgr:LCGT_1792     |     | 59     | 0.426 | 61  | PICI     | 1755947 | 1768604 | 12.7 |                                                 |
| lgv:LCGL_1813     |     | 59     | 0.426 | 61  | PICI     | 1769776 | 1782433 | 12.7 |                                                 |



| Gene           |     | length | sim   | OL  | insert   | start   | end     | size | comment                                  |
|----------------|-----|--------|-------|-----|----------|---------|---------|------|------------------------------------------|
| evi:Echvi_3649 |     | 1172   | 0.387 | 75  | NI       |         |         |      |                                          |
| llt:CVCAS_0034 | HP  | 173    | 1.000 | 173 | PICI     | 36265   | 50942   | 14.7 |                                          |
| lla:L41670     |     | 173    | 1.000 | 173 | PICI     | 35516   | 50948   | 14.4 |                                          |
| llm:llmg_2260  |     | 173    | 0.789 | 171 | PICI     | 2211673 | 2228382 | 16.7 | Has phage resistance                     |
| lln:llnZ_11660 |     | 173    | 0.789 | 171 | PICI     | 2211673 | 2228382 | 16.7 | Has phage resistance                     |
| lld:P620_01795 |     | 173    | 0.789 | 171 | PICI     | 321043  | 333060  | 12.0 | 3' end uncertain                         |
| llk:llkF_2456  |     | 174    | 0.759 | 174 | PICI     | 2505047 | 2520583 | 15.0 |                                          |
| llc:LACR_2265  |     | 201    | 0.724 | 170 | PICI     | 2116658 | 2128806 | 12.2 |                                          |
| llr:llh_11460  |     | 201    | 0.679 | 168 | PICI     | 2111920 | 2125925 | 14.0 |                                          |
| mar:MAE_57910  |     | 265    | 0.313 | 134 | NI       |         |         |      |                                          |
| cbr:CBG10226   |     | 806    | 0.312 | 112 | No map   |         |         |      | Caenorhabditis                           |
| llt:CVCAS_0035 | HP  | 64     | 1.000 | 64  | PICI     | 36265   | 50942   | 14.7 |                                          |
| lla:L42195     |     | 64     | 1.000 | 64  | PICI     | 35516   | 50948   | 14.4 |                                          |
| lld:P620_02515 |     | 64     | 0.969 | 64  | PICI     | 453940  | 463397  | 9.3  | Defective                                |
| llr:llh_11465  |     | 64     | 0.953 | 64  | PICI     | 2111920 | 2125925 | 14.0 |                                          |
| lls:lilo_1816  |     | 73     | 0.922 | 64  | PICI     | 1963199 | 1976945 | 13.7 |                                          |
| llk:llkF_2455  |     | 64     | 0.938 | 64  | PICI     | 2505047 | 2520583 | 15.0 |                                          |
| llc:LACR_2266  |     | 64     | 0.938 | 64  | PICI     | 2116658 | 2128806 | 12.2 |                                          |
| llm:llmg_0037  |     | 64     | 0.922 | 64  | PICI     | 32974   | 51647   | 18.6 |                                          |
| lln:llnZ_00180 |     | 64     | 0.922 | 64  | PICI     | 32974   | 51647   | 18.6 |                                          |
| llt:CVCAS_0036 | reg | 246    | 1.000 | 246 | PICI     | 36265   | 50942   | 14.7 |                                          |
| lla:L42465     |     | 246    | 1.000 | 245 | PICI     | 35516   | 50948   | 14.4 |                                          |
| llm:llmg_2527  |     | 230    | 0.327 | 196 | PICI     | 2478636 | 2491949 | 13.3 |                                          |
| lln:llnZ_13050 |     | 230    | 0.327 | 196 | PICI     | 2479452 | 2492765 | 13.3 |                                          |
| lld:P620_01785 |     | 230    | 0.321 | 196 | PICI     | 321043  | 330910  | 9.9  |                                          |
| llk:llkF_2454  |     | 230    | 0.306 | 196 | PICI     | 2505047 | 2520583 | 15.0 |                                          |
| lgr:LCGT_1785  |     | 232    | 0.298 | 188 | PICI     | 1755947 | 1768604 | 12.7 |                                          |
| lgv:LCGL_1806  |     | 232    | 0.298 | 188 | PICI     | 1769776 | 1782433 | 12.7 |                                          |
| efm:M7W_2070   |     | 241    | 0.367 | 120 | Prophage | 1889045 | 1924864 | 39.5 |                                          |
| ehr:EHR_09450  |     | 241    | 0.358 | 120 | Prophage | 1847859 | 1882330 | 34.5 |                                          |
| llt:CVCAS_0037 | HP  | 246    | 1.000 | 246 | PICI     | 36265   | 50942   | 14.7 |                                          |
| lla:L42465     |     | 246    | 1.000 | 245 | PICI     | 35516   | 50948   | 14.4 |                                          |
| llm:llmg_2527  |     | 230    | 0.327 | 196 | PICI     | 2478636 | 2491949 | 13.3 |                                          |
| lln:llnZ_13050 |     | 230    | 0.327 | 196 | PICI     | 2479452 | 2492765 | 13.3 |                                          |
| lld:P620_01785 |     | 230    | 0.321 | 196 | PICI     | 321043  | 330910  | 9.9  |                                          |
| llk:llkF_2454  |     | 230    | 0.306 | 196 | PICI     | 2505047 | 2520583 | 15.0 |                                          |
| lgr:LCGT_1785  |     | 232    | 0.298 | 188 | PICI     | 1755947 | 1768604 | 12.7 |                                          |
| lgv:LCGL_1806  |     | 232    | 0.298 | 188 | PICI     | 1769776 | 1782433 | 12.7 |                                          |
| efm:M7W_2070   |     | 241    | 0.367 | 120 | Prophage | 1889045 | 1924864 | 39.5 |                                          |
| ehr:EHR_09450  |     | 241    | 0.358 | 120 | Prophage | 1847859 | 1882330 | 34.5 |                                          |
| llt:CVCAS_0038 | HP  | 128    | 1.000 | 246 | PICI     | 36265   | 50942   | 14.7 |                                          |
| lla:L43680     |     | 128    | 1.000 | 128 | PICI     | 35516   | 50948   | 14.4 |                                          |
| llr:llh_12770  |     | 128    | 0.781 | 128 | PICI     | 2352357 | 2368410 | 16.0 |                                          |
| llc:LACR_2269  |     | 127    | 0.701 | 127 | PICI     | 2116658 | 2128806 | 12.2 |                                          |
| llm:llmg_0041  |     | 140    | 0.550 | 129 | PICI     | 32974   | 51647   | 18.6 |                                          |
| lln:llnZ_00200 |     | 146    | 0.550 | 129 | PICI     | 32974   | 51647   | 18.6 |                                          |
| llw:kw2_0886   |     | 118    | 0.505 | 111 | PICI     | 903732  | 908883  | 5.1  | Defective PICI? Has lysin gene           |
| lld:P620_12480 |     | 141    | 0.454 | 130 | Prophage | 2348850 | 2374861 | 26.0 | Defective prophage, 2 int genes, no tail |
| lgr:LCGT_1146  |     | 114    | 0.470 | 115 | Prophage | 1110376 | 1146622 | 36.2 |                                          |
| lgv:LCGL_1166  |     | 114    | 0.470 | 115 | Prophage |         |         |      |                                          |
| lli:lli_0637   |     | 115    | 0.461 | 115 | NI       |         |         |      |                                          |

| Gene             |     | length | sim   | OL  | insert   | start   | end     | size | comment                          |
|------------------|-----|--------|-------|-----|----------|---------|---------|------|----------------------------------|
| efq:DR75_1672    |     | 110    | 0.456 | 114 | Prophage | 1660409 | 1695776 | 35.4 |                                  |
| llt:CVCAS_0039   | reg | 184    | 1.000 | 184 | PICI     | 36265   | 50942   | 14.7 |                                  |
| lla:L44085       |     | 184    | 1.000 | 184 | PICI     | 35516   | 49727   | 14.2 |                                  |
| llm:llmg_0042    |     | 184    | 0.924 | 184 | PICI     | 32974   | 51647   | 18.6 |                                  |
| lln:llnZ_00205   |     | 184    | 0.924 | 184 | PICI     | 32974   | 51647   | 18.6 |                                  |
| llr:llh_12765    |     | 184    | 0.913 | 184 | PICI     | 2352357 | 2368410 | 16.0 |                                  |
| llc:LACR_2270    |     | 183    | 0.799 | 184 | PICI     | 2116658 | 2128806 | 12.2 |                                  |
| lld:P620_12940   |     | 98     | 0.887 | 97  | PICI     | 2464618 | 2479987 | 15.4 |                                  |
| lgr:LCGT_0311    |     | 196    | 0.395 | 195 | NI       |         |         |      |                                  |
| lgv:LGL_0311     |     | 196    | 0.395 | 195 | NI       |         |         |      |                                  |
| llk:llkF_1033    |     | 187    | 0.343 | 181 | Prophage | 1066254 | 1100809 | 34.6 |                                  |
| llt:CVCAS_0040   | reg | 64     | 1.000 | 64  | PICI     | 36265   | 50942   | 14.7 |                                  |
| lla:L45035       |     | 64     | 1.000 | 64  | PICI     | 35516   | 49727   | 14.2 |                                  |
| llm:llmg_0044    |     | 64     | 0.984 | 64  | PICI     | 32974   | 51647   | 18.6 |                                  |
| lln:llnZ_00215   |     | 64     | 0.984 | 64  | PICI     | 32974   | 51647   | 18.6 |                                  |
| llr:llh_12760    |     | 64     | 0.984 | 64  | PICI     | 2352357 | 2368410 | 16.0 |                                  |
| llc:LACR_2271    |     | 64     | 0.969 | 64  | PICI     | 2116658 | 2128806 | 12.2 |                                  |
| lld:P620_12935   |     | 64     | 0.969 | 64  | PICI     | 2464618 | 2479987 | 15.4 |                                  |
| llk:llkF_2448    |     | 64     | 0.938 | 64  | PICI     | 2505047 | 2520583 | 15.0 |                                  |
| loa:LOAG_08304   |     | 788    | 0.372 | 43  |          |         |         |      | eye worm gene                    |
| llt:CVCAS_0041   | reg | 53     | 1.000 | 53  | PICI     | 36265   | 50942   | 14.7 |                                  |
| lla:L45351       |     | 80     | 0.981 | 53  | PICI     | 35516   | 49727   | 14.2 |                                  |
| llm:llmg_0047    |     | 80     | 0.962 | 53  | PICI     | 32974   | 51647   | 18.6 |                                  |
| lln:llnZ_00240   |     | 80     | 0.962 | 53  | PICI     | 32974   | 51647   | 18.6 |                                  |
| cat:CA2559_02645 |     | 294    | 0.368 | 38  | NI       |         |         |      |                                  |
| llt:CVCAS_0042   | HP  | 74     | 1.000 | 74  | PICI     | 36265   | 50942   | 14.7 |                                  |
| lla:L45702       |     | 74     | 1.000 | 74  | PICI     | 35516   | 49727   | 14.2 |                                  |
| llm:llmg_0048    |     | 74     | 1.000 | 74  | PICI     | 32974   | 51647   | 18.6 |                                  |
| lln:llnZ_00245   |     | 70     | 1.000 | 70  | PICI     | 32974   | 51647   | 18.6 |                                  |
| cso:CLS_07510    |     | 55     | 0.491 | 53  | NI       |         |         |      |                                  |
| ckl:CKL_1132     |     | 56     | 0.446 | 56  | NI       |         |         |      |                                  |
| ere:EUBREC_3588  |     | 55     | 0.462 | 52  |          |         |         |      | Tiny defective prophage remnant? |
| mer:H729_05640   |     | 69     | 0.441 | 59  | NI       |         |         |      |                                  |
| cdf:CD630_05860  |     | 59     | 0.453 | 53  | NI       |         |         |      |                                  |
| lmc:Lm4b_00359   |     | 62     | 0.463 | 54  | NI       |         |         |      |                                  |
| llt:CVCAS_0043   | HP  | 108    | 1.000 | 108 | PICI     | 36265   | 50942   | 14.7 |                                  |
| lld:P620_13295   |     | 108    | 1.000 | 108 | PICI     | 2530163 | 2544289 | 14.1 |                                  |
| llm:llmg_0051    |     | 108    | 1.000 | 108 | PICI     | 32974   | 51647   | 18.6 |                                  |
| lln:llnZ_00260   |     | 108    | 1.000 | 108 | PICI     | 32974   | 51647   | 18.6 |                                  |
| llk:llkF_2449    |     | 108    | 0.963 | 108 | PICI     | 2505047 | 2520583 | 15.0 |                                  |
| llc:LACR_C39     |     | 120    | 0.627 | 102 |          |         |         |      | Transposon on plasmid            |
| lli:lli_p6024    |     | 120    | 0.627 | 102 |          |         |         |      | Transposon on plasmid            |
| llr:llh_13780    |     | 117    | 0.618 | 102 |          |         |         |      | Transposon on plasmid            |
| lpq:AF91_13470   |     | 105    | 0.519 | 106 | NI       |         |         |      |                                  |
| lca:LSEI_2757    |     | 105    | 0.519 | 106 | NI       |         |         |      |                                  |
| llt:CVCAS_0044   | HP  | 54     | 1.000 | 54  | PICI     | 36265   | 50942   | 14.7 |                                  |
| lla:L200004      |     | 54     | 1.000 | 54  | PICI     | 35516   | 50948   | 14.4 |                                  |
| lld:P620_12920   |     | 54     | 1.000 | 54  | PICI     | 2463882 | 2479987 | 16.1 |                                  |
| llm:llmg_0053    |     | 54     | 1.000 | 54  | PICI     | 32974   | 51647   | 18.6 |                                  |
| lln:llnZ_00265   |     | 54     | 1.000 | 54  | PICI     | 32974   | 51647   | 18.6 |                                  |

| Gene             |     | length | sim   | OL  | insert   | start   | end     | size | comment                   |
|------------------|-----|--------|-------|-----|----------|---------|---------|------|---------------------------|
| llk:llkF_2446    |     | 54     | 0.926 | 54  | PICI     | 2505047 | 2520583 | 15.0 |                           |
| llw:kw2_2347     |     | 53     | 0.731 | 52  | NI       |         |         |      |                           |
| llc:LACR_2598    |     | 53     | 0.712 | 52  | NI       |         |         |      |                           |
| lli:lli_2241     |     | 53     | 0.712 | 52  | NI       |         |         |      |                           |
| llr:llh_13190    |     | 53     | 0.712 | 52  | NI       |         |         |      |                           |
| lls:lilo_0576    |     | 66     | 0.558 | 52  | NI       |         |         |      |                           |
| lgr:LCGT_1418    |     | 64     | 0.560 | 50  | NI       |         |         |      |                           |
| lgv:LCGL_1439    |     | 64     | 0.560 | 50  | NI       |         |         |      |                           |
| llt:CVCAS_0045   | HP  | 101    | 1.000 | 101 | PICI     | 36265   | 50942   | 14.7 |                           |
| lla:L47979       |     | 101    | 1.000 | 101 | PICI     | 35516   | 50948   | 14.4 |                           |
| llm:llmg_0054    |     | 101    | 1.000 | 101 | PICI     | 32974   | 51647   | 18.6 |                           |
| lln:llnZ_00270   |     | 101    | 1.000 | 101 | PICI     | 32974   | 51647   | 18.6 |                           |
| llk:llkF_2445    |     | 101    | 0.990 | 101 | PICI     | 2505047 | 2520583 | 15.0 |                           |
| lgr:LCGT_1323    |     | 99     | 0.494 | 87  | NI       |         |         |      |                           |
| lgv:LCGL_1344    |     | 99     | 0.494 | 87  | NI       |         |         |      |                           |
| lcn:C270_07595   |     | 99     | 0.354 | 99  | NI       |         |         |      |                           |
| llt:CVCAS_0046   | int | 394    | 1.000 | 394 | PICI     | 36265   | 50942   | 14.7 |                           |
| lla:L48477       |     | 394    | 0.997 | 394 | PICI     | 35516   | 50948   | 14.4 |                           |
| llm:llmg_0055    |     | 394    | 0.997 | 394 | PICI     | 32974   | 51647   | 18.6 |                           |
| lln:llnZ_00275   |     | 394    | 0.997 | 394 | PICI     | 32974   | 51647   | 18.6 |                           |
| lld:P620_01770   |     | 398    | 0.515 | 396 | PICI     | 321043  | 333060  | 12.0 | 3'end uncertain           |
| llc:LACR_0301    |     | 398    | 0.513 | 396 | PICI     | 278489  | 289370  | 10.9 | 3'end uncertain           |
| llk:llkF_2008    |     | 399    | 0.477 | 396 | PICI     | 2063071 | 2074196 | 11.1 |                           |
| lls:lilo_1819    |     | 410    | 0.470 | 396 | PICI     | 1963199 | 1976945 | 13.7 |                           |
| llr:llh_10885    |     | 393    | 0.471 | 397 | Prophage | 1973375 | 2011192 | 37.8 |                           |
| lgr:LCGT_1777    |     | 396    | 0.415 | 393 | PICI     | 1755947 | 1768604 | 12.5 |                           |
| lgv:LCGL_1798    |     | 396    | 0.415 | 393 | PICI     | 1769776 | 1782433 | 12.6 |                           |
| lli:lli_1862     |     | 343    | 0.444 | 347 | Prophage | 1846819 | 1857113 | 10.9 | Defective. Has <i>dut</i> |
| snu:SPNA45_01857 |     | 388    | 0.414 | 391 | PICI     | 1886061 | 1902018 | 15.9 |                           |
| smb:smi_2017     |     | 388    | 0.376 | 391 | PICI     | 2057587 | 2070717 | 13.1 |                           |

\*ORFs that are not annotated in LlCICV56-1 but are annotated in LlCIIL1403-1, which has the identical sequence in that region.

**Table S7. Putative phage-inducible chromosomal islands of Gram-positive cocci.**

| PICI          | Strain                                | Accession number<br>(Genomic location) | Size<br>(kb) | att site core                                                                          | Accessory genes <sup>b</sup>                    |
|---------------|---------------------------------------|----------------------------------------|--------------|----------------------------------------------------------------------------------------|-------------------------------------------------|
| EfCIV583      | <i>E. faecalis</i> V583               | AE016830<br>(2816732-2829670)          | 12.9         | TATTAATGAAACAACGTG                                                                     | UvrB protein; Cold-shock protein                |
| EfCILA3B-2    | <i>E. faecalis</i> LA3B-2             | ATJC01000082<br>(5397-18340)           | 12.9         | TAAACTGTAAGTTTAGT                                                                      | Cold-shock protein                              |
| EfCI918       | <i>E. faecalis</i> 918                | AVNY01000040<br>(1-12614)              | 12.6         | TATTAATGAAACAACGTG                                                                     | UvrB protein; Cold-shock protein                |
| EfCIB16457    | <i>E. faecalis</i> B16457             | AIIL01000003<br>(236044-248787)        | 12.7         | TATTAATGAAACAACGTG                                                                     | UvrB protein; Cold-shock protein                |
| EfCISF105     | <i>E. faecalis</i> SF105              | AJEE01000013<br>(53058- 65413)         | 12.3         | TATTAATGAAACAACGTG                                                                     | UvrB protein; Cold-shock protein                |
| LICiBIL310    | <i>L. lactis</i> IL1403               | AE005176<br>(34907-49863)              | 14.9         | CAAAAAAACAACACTGATTGAATGCCGTATG                                                        | Enterocin immunity (EntA); LtrA                 |
| LICiBIL312    | <i>L. lactis</i> IL1403               | AE005176<br>(502595-517773)            | 15.1         | GAAAGACGCAGTTAAATAATTATAGCTAT                                                          | Peptidase_M48; Cold shock protein               |
| LICINZ9000-1  | <i>L. lactis</i> - cremoris NZ9000    | CP002094<br>(32370-51783)              | 19.4         | CAAAAAAACAACACTGATTGAATGCCGT                                                           | <i>bcnA</i> ; IS712A; Non-specific endonuclease |
| LICINZ9000-2  | <i>L. lactis</i> - cremoris NZ9000    | CP002094<br>(2210232-2228483)          | 18.3         | TAGAACTATGTTAAAA                                                                       | Abortive phage resistance                       |
| LICI-NZ9000-3 | <i>L. lactis</i> - cremoris NZ9000    | CP002094<br>(2482743-2492765)          | 10.3         | ATTCACCTTGAGCAATGAATATA                                                                | LtrA                                            |
| LICISK11      | <i>L. lactis</i> - cremoris SK11      | CP000425<br>(2115981-2128907)          | 12.9         | TAGAACTATGTTAAAA                                                                       | DNA/RNA non-specific endonuclease               |
| LICICV56-1    | <i>L. lactis</i> - lactis CV56        | CP002365<br>(36265-50942)              | 14.7         | CAAAAAAACAACACTGATTGAATGCCGTATG                                                        | Enterocin immunity (EntA); LtrA                 |
| LICI-CV56-2   | <i>L. lactis</i> - lactis CV56        | CP002365<br>(1723782-1733895)          | 10.1         | J <sub>L</sub> TAAAAAATAGGACCTAAGACTGATGA<br>J <sub>R</sub> TAAAAAATCAGACCTAAGACTTATGA | Cold shock protein                              |
| LICIKLDS-2    | <i>L. lactis</i> - lactis KLDS 4.0325 | CP006766<br>(1903120-1915186)          | 12.1         | TCAGACCTAAGACTGATGATATAAAG                                                             |                                                 |
| LICI-KLDS-3   | <i>L. lactis</i> - lactis KLDS 4.0325 | CP006766<br>2464508-2479769            | 15.2         | GCTATAATAAACTATAT                                                                      | Prohead protease                                |
| LICIA76-1     | <i>L. lactis</i> - cremoris A76       | CP003132<br>(2111244-2126036)          | 14.8         | TTTTAACATAGTTCTATTTTATCACA                                                             |                                                 |
| LICIA76-2     | <i>L. lactis</i> - cremoris A76       | CP003132<br>(2352993- 2368188)         | 15,2         | TAAACTATA                                                                              |                                                 |
| LICIKF147     | <i>L. lactis</i> - lactis KF147       | CP001834<br>(2505680- 2520561)         | 14.9         | TAAACTATA                                                                              | BcnA-imm; Pyrimidine dimer DNA glycosylases     |
| MG1363-1      | <i>L. lactis</i> - lactis MG1363      | AM406671<br>(32370-51783)              | 19.4         | CAAAAAAACAACACTGATTGAATGCCGT                                                           | <i>bcnA</i> ; IS712A; Non-specific endonuclease |

| PICI               | Strain                             | Accession number<br>(Genomic location) | Size<br>(kb) | att site core       | Accessory genes <sup>b</sup>                       |
|--------------------|------------------------------------|----------------------------------------|--------------|---------------------|----------------------------------------------------|
| SpnCI-Taiwan-0.03  | <i>S. pneumoniae</i> Taiwan        | NC_012469<br>3563-23357                | 19.8         | CCCTTTTTGTGTTA      |                                                    |
| SpnCI-ST556-0.03   | <i>S. pneumoniae</i> ST556         | CP003357<br>3563-21646                 | 18.1         | CCCTTTTTGTGTTA      |                                                    |
| SpnCI-Taiwan-0.2   | <i>S. pneumoniae</i> Taiwan        | NC_012469<br>197987-210888             | 12.9         | TACAAAATCGGCTTTTTT  |                                                    |
| SpnCI-Tigr4-1.06   | <i>S. pneumoniae</i> Tigr4         | NC_003028<br>1063231-1073321           | 10.1         | CCTAACAAAAC         | TA system                                          |
| SpnCI-INV104-1.06  | <i>S. pneumoniae</i> INV104        | FQ312030<br>1070841-1079518            | 8.7          | CCTTAAAAAATAA       |                                                    |
| SpnCI-A45-1.9      | <i>S. pneumoniae</i> A45           | NC_018594.1<br>1887286-1902018         | 14.7         | GCCCATACAAACCCATA   | DNA-damage-inducible protein D                     |
| SsuCI-TL13         | <i>S. suis</i> TL-13               | CP003993<br>1339840-1351861            | 12.0         | CTTGAAAAAATAA       |                                                    |
| SolCI-AS1.3089-0.6 | <i>S. oligofermentans</i> AS1.3089 | CP004409.1<br>602331'-612649           | 10.3         | CTTGAAAAAATAA       | TA system                                          |
| SpnCI-TCH8341-0.45 | <i>S. pneumoniae</i> TCH8341/19A   | CP001993<br>(440193-453094)            | 12.9         | ATTATACTACAAAATCGGC |                                                    |
| SpnCI-TCH8341-0.25 | <i>S. pneumoniae</i> TCH8341/19A   | CP001993<br>(248868-267453)            | 18.6         | TAACACAAAAAGGG      | DNA-damage-inducible protein D<br>Inserted plasmid |

<sup>a</sup>NI: Not identified.

<sup>b</sup>The identities of the accessory genes are based on annotations; none has been tested experimentally.

**Table S8. Role of the cloned *cos* site in pAGEnt transfer<sup>a</sup>.**

| <b>Donor strain</b> | <b>Cloned site <i>cos</i></b> | <b>Plasmid titre<sup>b</sup></b> |
|---------------------|-------------------------------|----------------------------------|
| JP14198             | Empty vector                  | < 10                             |
| JP14199             | Phage bIL286                  | 4.5 x 10 <sup>2</sup>            |
| JP14203             | LICI-bIL310                   | 1.2 x 10 <sup>2</sup>            |

<sup>a</sup>The means of results from three independent experiments are shown. Variation was within  $\pm 5\%$  in all cases.

<sup>b</sup>No. of transductants/ml induced culture, using IL1403 as recipient strain.

**Table S9. Orthology analysis of SpnCI6706B**

**Abbreviations**

|                               |                                              |
|-------------------------------|----------------------------------------------|
| spn: SPN TIGR4                | SPN = <i>Streptococcus pneumoniae</i>        |
| std: SPPN                     | SPNN = <i>S. pseudopneumoniae</i>            |
| snb: SPN 670-6B               |                                              |
| snc: SPN TCH8431/19A          |                                              |
| snd: SPN ST556                |                                              |
| sni: SPN INV104               |                                              |
| snt: SPN Taiwan19f-14         |                                              |
| snu: SPN A45                  |                                              |
| spi: SPY MGAS10750            |                                              |
| smb: SMB                      | SMB = <i>S. mitis</i> B                      |
| scp: SPS ATCC 15912           | SPS = <i>S. parasanguinis</i>                |
| stc: STH CNRZ1066             |                                              |
| ste: STH LMD-9                | STH = <i>S. thermophilus</i>                 |
| stn: STH ND03                 |                                              |
| stw: STH MN-ZLW-002           |                                              |
| spv: SPN Hungary19A 6         |                                              |
| stk: SPU                      | SPU = <i>S. parauberis</i>                   |
| sthe:STH ASCC 1725            |                                              |
| sga: SGL UCN34                | SGL = <i>S. galactiae</i>                    |
| sgg: SGL ATCC BAA-2069        |                                              |
| sgt: SGL ATCC 43143           |                                              |
| sjj: SPN JJA                  |                                              |
| sagm:SAG 09mas018883          |                                              |
| sub: SUB                      | SUB = <i>S. uberis</i>                       |
| sui: SSU T15                  | SSU = <i>S. suis</i>                         |
| ssut: SSU TL-13               |                                              |
| sst: SSU ST3                  |                                              |
| ssuy: SSU YB51                |                                              |
| slu: SLT KE3                  | SLT = <i>S. lutetiensis</i>                  |
| sak: SAG A909                 | SAG = <i>S. agalactiae</i>                   |
| sagt:SAG COH1                 |                                              |
| nce: NCE                      | NCE = <i>Nocema seranae</i>                  |
| stx: SPY MGAS1882             | SPY = <i>S. pyogenes</i>                     |
| spnn:SPN A026                 |                                              |
| lmn: LMO 08-5778              | LMO = <i>Listeria monocytogenes</i>          |
| fsc: FSU                      | FSU = <i>Fibrinobacter succinogenes</i>      |
| pph: PPH                      | PPH = <i>Pelodictyon phaeoclathratiforme</i> |
| drs: =Dehalobacter restrictus |                                              |
| dec: =Dehalobacter sp. CF     |                                              |
| ded: =Dehalobacter sp. DCA    |                                              |
| rbr: =Ruminococcus bromii     |                                              |

## Orthologs

| Gene                               | length      | sim   | OL  | insert                                                                      | site | size | site            |
|------------------------------------|-------------|-------|-----|-----------------------------------------------------------------------------|------|------|-----------------|
| snb:SP670_0026 (388 a.a.)          | <i>int</i>  |       |     |                                                                             |      |      |                 |
| snc:HMPREF0837_10291               | 388         | 0.874 | 388 | PICI                                                                        | 0.25 | 14.9 | <i>dnaA</i>     |
| snd:MY_0032                        | 398         | 0.874 | 388 | PICI                                                                        | 0.01 | 16.1 | <i>dnaA</i>     |
| snt:SPT_0037                       | 388         | 0.874 | 388 | PICI                                                                        | 0.01 | 14.9 | <i>dnaA</i>     |
| smb:smi_2017                       | 388         | 0.546 | 388 | PICI                                                                        | 2.05 | 12.2 | sugar hydrolase |
| scp:S. parasangui:HMPREF0833_11010 | 388         | 0.549 | 388 | PICI                                                                        | 1.02 | 10.6 | <i>cna</i>      |
| ste:STER_0829                      | 388         | 0.531 | 388 | PICI                                                                        | 0.74 | 9.4  | <i>pabB</i>     |
| stc:str0783                        | 388         | 0.531 | 388 | PICI                                                                        | 0.73 | 8.1  | <i>pabB</i>     |
| sthe:T303_05120                    | 388         | 0.531 | 388 | PICI                                                                        | 0.93 | 7.7  | <i>dltD</i>     |
| stn:STND_0774                      | 388         | 0.531 | 388 | PICI                                                                        | 0.75 | 10.2 | <i>uvrA</i>     |
| stw:YIU_C0751                      | 388         | 0.531 | 388 | PICI                                                                        | 0.73 | 6.5  | <i>pabB</i>     |
| spv:SPH_0289                       | 388         | 0.536 | 388 | PICI                                                                        | 0.26 | 12.4 | <i>uvrA</i>     |
| stkpara:STP_1346                   | 386         | 0.525 | 387 | PICI                                                                        | 1.48 | 11   | SAM             |
| sga:GALLO_2149                     | 388         | 0.525 | 387 | PICI                                                                        | 2.2  | 11.9 | <i>gshA</i>     |
| sgg:SGGBAA2069_c21460              | 388         | 0.525 | 387 | PICI                                                                        | 2.2  | 11.8 | <i>gshA</i>     |
| sgt:S_GGB_2132                     | 388         | 0.525 | 387 | PICI                                                                        | 2.2  | 11.9 | <i>gshA</i>     |
| sagm:BSA_21480                     | 388         | 0.503 | 388 | PICI                                                                        | 2.1  | 14.6 | <i>rpsD</i>     |
| sub:SUB1840                        | 388         | 0.505 | 388 | PICI                                                                        | 1.8  | 12.6 | <i>rpsD</i>     |
| slu:KE3_0026                       | 381         | 0.518 | 388 | PICI                                                                        | 0.03 | 11.0 | <i>tyrS</i>     |
| sak:SAK_2094                       | 388         | 0.508 | 388 | PICI                                                                        | 2.06 | 15.6 | <i>rpsD</i>     |
| snb:SP670_0025 (284 a.a.)          | <i>dinD</i> |       |     |                                                                             |      |      |                 |
| snu:SPNA45_01858                   | 274         | 0.993 | 271 | PICI                                                                        | 1.9  | 14.7 | <i>yesMN</i>    |
| drs:DEHRE_03560                    | 278         | 0.598 | 276 | NI*                                                                         |      |      |                 |
| dec:DCF50_p2453                    | 278         | 0.583 | 276 | NI                                                                          |      |      |                 |
| ded:DHBDA p2442                    | 278         | 0.583 | 276 | NI                                                                          |      |      |                 |
| rbr:RBR_05470                      | 280         | 0.561 | 278 | NI                                                                          |      |      |                 |
| snc:HMPREF0837_10290               | 186         | 0.987 | 155 | PICI                                                                        | 0.25 | 14.9 | <i>dnaA</i>     |
| snd:MY_0031                        | 186         | 0.987 | 155 | PICI                                                                        | 0.01 | 14.9 | <i>dnaA</i>     |
| snt:SPT_0036                       | 186         | 0.987 | 155 | PICI                                                                        | 0.01 | 14.9 | <i>dnaA</i>     |
| fsc:FSU_1649                       | 279         | 0.570 | 270 | NI                                                                          |      |      |                 |
| fsu:Fisuc_1187                     | 279         | 0.570 | 270 | NI                                                                          |      |      |                 |
| pph:Ppha_0973                      | 362         | 0.525 | 276 | NI                                                                          |      |      |                 |
| xne:XNC1_0195                      | 271         | 0.549 | 266 | defective and rearranged PICI-like fragment xne:XNE =Xenorabdus nematophila |      |      |                 |
| snb:SP670_0024 (238 a.a.)          | <i>rpr</i>  |       |     |                                                                             |      |      |                 |
| snc:HMPREF0837_10283               | 246         | 0.983 | 237 | PICI                                                                        | 0.25 | 18.1 | <i>dnaN</i>     |
| snd:MY_0025                        | 246         | 0.983 | 237 | PICI                                                                        | 0.01 | 16.1 | <i>dnaA</i>     |
| snt:SPT_0029                       | 238         | 0.983 | 237 | PICI                                                                        | 0.01 | 14.9 | <i>dnaA</i>     |
| snu:SPNA45_01863                   | 255         | 0.745 | 239 | PICI                                                                        | 1.9  | 15.4 | <i>yesMN</i>    |
| sjj:SPJ_1901                       | 250         | 0.626 | 246 | prophage                                                                    |      |      |                 |



| Gene                      |             | length | sim   | OL  | insert | site | size | site              |
|---------------------------|-------------|--------|-------|-----|--------|------|------|-------------------|
| snb:SP670_0023 (50 a.a.)  | <i>reg</i>  |        |       |     |        |      |      |                   |
| snc:HMPREF0837_10282      |             | 50     | 1.000 | 50  | PICI   | 0.25 | 18.1 | <i>dnaN</i>       |
| snd:MYY_0024              |             | 50     | 1.000 | 50  | PICI   | 0.01 | 16.1 | <i>dnaA</i>       |
| snt:SPT_0028              |             | 50     | 1.000 | 50  | PICI   | 0.01 | 14.9 | <i>dnaA</i>       |
| saua:SAAG_02514           |             | 73     | 0.460 | 50  | Proph  | 2.0  | 43.4 | <i>h1b</i>        |
| snb:SP670_0022 (194 a.a.) | <i>antr</i> |        |       |     |        |      |      |                   |
| ssq:SSUD9_2185            |             | 248    | 0.568 | 192 | PICI   | 2.1  |      | <i>recF</i>       |
| sst:SSUST3_2012           |             | 248    | 0.568 | 192 | PICI   | 2.0  | 10.7 | <i>recF</i>       |
| ssuy:YB51_9970            |             | 248    | 0.568 | 192 | PICI   | 2.0  | 10.7 | <i>recF</i>       |
| spy:SPy_2127              |             | 255    | 0.457 | 184 | PICI   | 1.8  | 12.9 | <i>mutS/L</i>     |
| stz:SPYALAB49_001792      |             | 193    | 0.457 | 184 | PICI   | 1.7  | 13.2 | <i>mutS/L</i>     |
| sdq:SDSE167_2198          |             | 255    | 0.446 | 184 | PICI   | 2.0  | 19.6 | <i>mutS/L</i>     |
| sdq:SDE12394_10830        |             | 187    | 0.415 | 183 | PICI   | 2.1  | 14.8 | <i>rpsD</i>       |
| sds:SDEG_2138             |             | 187    | 0.415 | 183 | PICI   | 2.1  | 11.2 | <i>rpsD</i>       |
| ssui:T15_1236             |             | 261    | 0.425 | 153 | proph  | 1.2  | 33.0 | <i>rpsA</i>       |
| spb:M28_Spy1861           |             | 188    | 0.416 | 185 | PICI   | 1.8  | 10.8 | <i>rpsD</i>       |
| sph:MGAS10270_Spy1948     |             | 188    | 0.416 | 185 | PICI   | 1.8  | 10.7 | <i>rpsD</i>       |
| stg:MGAS15252_1718        |             | 188    | 0.416 | 185 | PICI   | 1.7  | 12.2 | <i>rpsD</i>       |
| clb:Clo1100_2443          |             | 239    | 0.453 | 148 | proph  | 2.7  | 26.3 | defective         |
| ctc:CTC01071              |             | 270    | 0.484 | 126 | proph  | 1.3  | 36.2 |                   |
| snb:SP670_0021 (208 a.a.) |             |        |       |     |        |      |      |                   |
| snc:HMPREF0837_10490      |             | 208    | 0.952 | 208 | PICI   | 0.44 | 15.4 | <i>uvrA</i>       |
| snt:SPT_0226              |             | 208    | 0.952 | 208 | PICI   | 0.2  | 12.4 | <i>uvrA</i>       |
| spnn:T308_00870           |             | 208    | 0.952 | 208 | PICI   | 1.6  | 12.4 | <i>uvrA</i>       |
| spv:SPH_0293              |             | 208    | 0.952 | 208 | PICI   | 0.26 | 12.4 | <i>uvrA</i>       |
| snd:MYY_0262              |             | 203    | 0.951 | 203 | PICI   | 0.24 | 12.4 | <i>uvrA</i>       |
| smb:smi_2013              |             | 208    | 0.841 | 208 | PICI   | 2.1  | 10.9 | sugar hydrolase   |
| std:SPPN_01200            |             | 209    | 0.833 | 209 | PICI   | 0.2  | 12.4 | <i>mnmA</i>       |
| scp:HMPREF0833_11006      |             | 208    | 0.812 | 208 | PICI   | 1.02 | 10.6 | <i>cna</i>        |
| snu:SPNA45_01864          |             | 200    | 0.779 | 199 | PICI   | 1.9  | 15.4 | <i>yesMN</i>      |
| ssut:TL13_1976            |             | 208    | 0.721 | 208 | PICI   | 2.0  | 15.1 | <i>recF</i>       |
| spn:SP_1134               |             | 205    | 0.744 | 203 | PICI   | 1.1  | 10.1 | <i>enolase</i>    |
| ssui:T15_1587             |             | 206    | 0.677 | 201 | PICI   | 1.60 | 10.0 | <i>fabG</i>       |
| snb:SP670_0020 (55 a.a.)  |             |        |       |     |        |      |      |                   |
| ssui:T15_1694             |             | 54     | 0.698 | 53  | proph  | 1.7  | 34.5 | <i>hupB</i>       |
| spy:SPy_0978              |             | 56     | 0.472 | 53  | proph  | 0.8  | 40.2 | <i>cpsFQ/mutX</i> |
| stz:SPYALAB49_001012      |             | 56     | 0.472 | 53  | proph  | 1.0  | 47.3 | <i>glgP</i>       |
| lld:P620_11580            |             | 61     | 0.412 | 51  | PICI   | 2.2  | 13.0 | <i>cutC</i>       |
| spb:M28_Spy1797           |             | 64     | 0.491 | 55  | PICI   | 1.8  | 13.3 | <i>mutS/L</i>     |
| sph:MGAS10270_Spy1881     |             | 64     | 0.491 | 55  | PICI   | 1.8  | 13.9 | <i>mutS/L</i>     |
| sagm:BSA_21410            |             | 57     | 0.439 | 57  | PICI   | 2.1  | 14.6 | <i>rpsD</i>       |
| snc:HMPREF0837_10278      |             | 77     | 0.473 | 55  | PICI   | 0.25 | 18.1 | <i>dnaN</i>       |
| snd:MYY_0020              |             | 57     | 0.473 | 55  | PICI   | 0.01 | 16.1 | <i>dnaA</i>       |
| snt:SPT_0023              |             | 57     | 0.473 | 55  | PICI   | 0.01 | 14.9 | <i>dnaA</i>       |
| snu:SPNA45_01866          |             | 57     | 0.473 | 55  | PICI   | 1.9  | 15.4 | <i>yesMN</i>      |
| aoe:Clos_1887             |             | 60     | 0.357 | 56  | NI     |      |      |                   |

| Gene                                      | length | sim   | OL  | insert | site | size | site             |
|-------------------------------------------|--------|-------|-----|--------|------|------|------------------|
| snb:SP670_0019 (142 a.a.)                 |        |       |     |        |      |      |                  |
| snc:HMPREF0837_10277                      | 142    | 0.993 | 142 | PICI   | 0.25 | 18.1 | <i>dnaN</i>      |
| snd:MYY_0019                              | 142    | 0.993 | 142 | PICI   | 0.01 | 16.1 | <i>dnaA</i> site |
| snt:SPT_0022                              | 142    | 0.993 | 142 | PICI   | 0.01 | 14.9 | <i>dnaA</i>      |
| spb:M28_Spy1799                           | 189    | 0.384 | 138 | PICI   | 1.80 | 14.0 | <i>mutS/L</i>    |
| snb:SP670_0018 (48 a.a.) HP (4 hits only) |        |       |     |        |      |      |                  |
| snc:HMPREF0837_10276                      | 48     | 1.000 | 48  | PICI   | 0.25 | 18.1 | <i>dnaN</i>      |
| snd:MYY_0018 hypothet                     | 48     | 1.000 | 48  | PICI   | 0.01 | 16.1 | <i>dnaA</i>      |
| snt:SPT_0021 hypothet                     | 48     | 1.000 | 48  | PICI   | 0.01 | 14.9 | <i>dnaA</i>      |
| rdn:HMPREF0733_10312                      | 1301   | 0.396 | 48  | NI     |      |      | <i>rpoC</i>      |
| snb:SP670_0017                            |        |       |     |        |      |      |                  |
| snc:HMPREF0837_10275                      | 49     | 0.980 | 49  | PICI   | 0.25 | 18.1 | <i>dnaN</i>      |
| snb:SP670_0016 (38 a.a.) (4 hits only)    |        |       |     |        |      |      |                  |
| snc:HMPREF0837_10274                      | 46     | 1.000 | 29  | PICI   | 0.25 | 18.1 | <i>dnaN</i>      |
| snd:MYY_0017                              | 46     | 1.000 | 29  | PICI   | 0.01 | 16.1 | <i>dnaA</i>      |
| snt:SPT_0020                              | 46     | 1.000 | 29  | PICI   | 0.01 | 14.9 | <i>dnaA</i>      |
| ssk:SSUD12_0495                           | 155    | 0.862 | 29  | PICI   | 0.5  | 11.6 | <i>lysS</i>      |
| snb:SP670_0015 (166 a.a.)                 |        |       |     |        |      |      |                  |
| snc:HMPREF0837_10273                      | 170    | 0.910 | 166 | PICI   | 0.25 | 18.1 | <i>dnaN</i>      |
| snd:MYY_0016                              | 170    | 0.910 | 166 | PICI   | 0.03 | 13.2 | <i>dnaA</i>      |
| snt:SPT_0019                              | 166    | 0.910 | 166 | PICI   | 0.01 | 14.9 | <i>dnaA</i>      |
| std:SPPN_01215                            | 169    | 0.800 | 165 | PICI   | 0.2  | 12.4 | <i>mnmA</i>      |
| eol:Emt01_1450                            | 514    | 0.342 | 73  | NI     |      |      |                  |
| snb:SP670_0014 (46 a.a.)                  |        |       |     |        |      |      |                  |
| snc:HMPREF0837_10272                      | 46     | 0.913 | 46  | PICI   | 0.25 | 18.1 | <i>dnaN</i>      |
| snt:SPT_0018                              | 46     | 0.913 | 46  | PICI   | 0.01 | 14.9 | <i>dnaA</i>      |
| smb:smi_2011                              | 66     | 0.826 | 46  | PICI   | 2.1  | 10.9 | sugar hydrolase  |
| snd:MYY_0015                              | 39     | 0.923 | 39  | PICI   | 0.01 | 16.1 | <i>dnaA</i>      |
| spnn:T308_00880                           | 66     | 0.674 | 46  | PICI   | 1.6  | 12.4 | <i>uvrA</i>      |
| spv:SPH_0295                              | 66     | 0.674 | 46  | PICI   | 0.26 | 12.4 | <i>uvrA</i>      |
| spn:SP_1136                               | 148    | 0.630 | 46  | PICI   | 1.1  | 11.5 | <i>enolase</i>   |
| scp:HMPREF0833_11005                      | 66     | 0.630 | 46  | PICI   | 1.02 | 10.6 | <i>cna</i>       |
| sni:INV104_09830                          | 59     | 0.590 | 39  | PICI   | 1.1  | 8.2  | <i>enloase</i>   |
| ssui:T15_1589                             | 63     | 0.571 | 42  | PICI   | 1.60 | 10.0 | <i>fabG</i>      |
| snb:SP670_0013 (71 a.a.)                  |        |       |     |        |      |      |                  |
| snc:HMPREF0837_10270                      | 71     | 0.986 | 71  | PICI   | 0.25 | 18.1 | <i>dnaN</i>      |
| snt:SPT_0016                              | 71     | 0.986 | 71  | PICI   | 0.01 | 14.9 | <i>dnaN</i>      |
| std:SPPN_01220                            | 71     | 0.901 | 71  | PICI   | 0.2  | 13.2 | <i>dnaN</i>      |
| scp:HMPREF0833_11004                      | 71     | 0.859 | 71  | PICI   | 1.02 | 12.4 | <i>mnmA</i>      |
| smb:smi_2010                              | 71     | 0.845 | 71  | PICI   | 2.1  | 10.9 | sugar hydrolase  |
| spnn:T308_00885                           | 71     | 0.789 | 71  | PICI   | 1.6  | 12.4 | <i>mnmA</i>      |
| spv:SPH_0296                              | 71     | 0.789 | 71  | PICI   | 0.26 | 12.4 | <i>uvrA</i>      |
| dav:DESACE_04385                          | 580    | 0.319 | 69  | NI     |      |      |                  |
| scg:SCI_1442                              | 64     | 0.349 | 63  | PICI   |      | 10.5 | <i>gpmA</i>      |

| Gene                      | length | sim   | OL  | insert | site | size | site                  |
|---------------------------|--------|-------|-----|--------|------|------|-----------------------|
| scon:SCRE_1399            | 64     | 0.349 | 63  | PICI   |      | 10.5 | <i>gpmA</i>           |
| scos:SCR2_1399            | 64     | 0.349 | 63  | PICI   |      | 0.5  | <i>gpmA</i>           |
| bvu:BVU_2093              | 583    | 0.432 | 37  | NI     |      |      |                       |
|                           |        |       |     |        |      |      |                       |
| snb:SP670_0012 (97 a.a.)  |        |       |     |        |      |      |                       |
| snc:HMPREF0837_10269      | 97     | 0.959 | 97  | PICI   | 0.25 | 18.1 | <i>dnaN</i>           |
| std:SPPN_01225            | 98     | 0.928 | 97  | PICI   | 0.2  | 12.4 | <i>mnmA</i>           |
| snu:SPNA45_01869          | 94     | 0.957 | 93  | PICI   | 1.9  | 14.7 | <i>yesMN</i> has dinD |
| smb:smi_2009              | 97     | 0.856 | 97  | PICI   | 2.1  | 10.9 | sugar hydrolase       |
| snd:MY_0013               | 68     | 0.956 | 68  | PICI   | 0.01 | 16.1 | <i>dnaA</i>           |
| snt:SPT_0015              | 58     | 0.948 | 58  | PICI   | 0.01 | 14.9 | <i>dnaA</i>           |
| nce:NCER_100853           | 221    | 0.302 | 96  | NI     |      |      |                       |
|                           |        |       |     |        |      |      |                       |
| snb:SP670_0011 (113 a.a.) |        |       |     |        |      |      |                       |
| snc:HMPREF0837_10268      | 113    | 1.000 | 113 | PICI   | 0.25 | 18.1 | <i>dnaN</i>           |
| snd:MY_0012               | 113    | 1.000 | 113 | PICI   | 0.01 | 16.1 | <i>dnaA</i>           |
| snt:SPT_0014              | 113    | 1.000 | 113 | PICI   | 0.01 | 14.9 | <i>dnaN</i>           |
| snu:SPNA45_01870          | 113    | 1.000 | 113 | PICI   | 1.9  | 15.4 | <i>yesMN</i>          |
| std:SPPN_01230            | 113    | 1.000 | 113 | PICI   | 0.2  | 12.4 | <i>mnmA</i>           |
| smb:smi_2008              | 113    | 0.841 | 113 | PICI   | 2.1  | 10.9 | sugar hydrolase       |
| spnn:T308_00890           | 113    | 0.841 | 113 | PICI   | 1.6  | 12.4 | <i>uvrA</i>           |
| spv:SPH_0297              | 113    | 0.841 | 113 | PICI   | 0.26 | 12.4 | <i>uvrA</i>           |
| scp:HMPREF0833_11003      | 113    | 0.735 | 113 | PICI   | 1.02 | 10.6 | <i>cna</i>            |
| sdq:SDSE167_2216          | 109    | 0.667 | 111 | PICI   | 2.0  | 19.6 | <i>mutL/S</i>         |
| spa:M6_Spy1814            | 109    | 0.667 | 111 | PICI   | 1.8  | 13.3 | <i>mutL/S</i>         |
| stg:MGAS15252_1660        | 109    | 0.667 | 111 | PICI   | 1.7  | 12.2 | <i>rpsD</i>           |
|                           |        |       |     |        |      |      |                       |
| snb:SP670_0010 (90 a.a.)  |        |       |     |        |      |      |                       |
| snc:HMPREF0837_10267      | 90     | 1.000 | 90  | PICI   | 0.25 | 18.1 | <i>dnaN</i>           |
| snt:SPT_0013              | 90     | 1.000 | 90  | PICI   | 0.01 | 14.9 | <i>dnaN</i>           |
| std:SPPN_01235            | 90     | 0.967 | 90  | PICI   | 0.2  | 12.4 | <i>mnmA</i>           |
| snd:MY_0266               | 93     | 0.708 | 89  | PICI   | 0.24 | 12.4 | <i>uvrA</i>           |
| spnn:T308_00895           | 93     | 0.708 | 89  | PICI   | 1.6  | 12.4 | <i>uvrA</i>           |
| spv:SPH_0298              | 93     | 0.708 | 89  | PICI   | 0.26 | 12.4 | <i>uvrA</i>           |
| smb:smi_2007              | 91     | 0.674 | 89  | PICI   | 2.1  | 10.9 | sugar hydrolase site  |
| scp:HMPREF0833_11002      | 91     | 0.607 | 89  | PICI   | 1.02 | 10.6 | <i>cna</i>            |
| ssut:TL13_0170            | 92     | 0.539 | 89  | PICI   | 0.14 | 13.1 | <i>ackA</i>           |
| sagt:GBSCOH1_1946         | 90     | 0.556 | 90  | PICI   | 2.0  | 14.8 | <i>rpsD</i>           |
| sst:SSUST3_2006           | 94     | 0.570 | 86  | PICI   | 2.0  | 13.5 | <i>recF</i>           |
|                           |        |       |     |        |      |      |                       |
| snb:SP670_0009 (286 a.a.) |        |       |     |        |      |      |                       |
| snc:HMPREF0837_10266      | 286    | 0.965 | 286 | PICI   | 0.25 | 18.1 | <i>dnaN</i>           |
| snd:MY_0011               | 286    | 0.965 | 286 | PICI   | 0.01 | 16.1 | <i>dnaA</i>           |
| snt:SPT_0012              | 286    | 0.965 | 286 | PICI   | 0.01 | 14.9 | <i>dnaN</i>           |
| smb:smi_2006              | 286    | 0.930 | 286 | PICI   | 2.1  | 10.9 | sugar hydrolase       |
| spnn:T308_00905           | 288    | 0.907 | 289 | PICI   | 1.6  | 12.4 | <i>uvrA</i>           |
| spv:SPH_0299              | 288    | 0.907 | 289 | PICI   | 0.26 | 12.4 | <i>uvrA</i>           |
| sagi:MSA_22030            | 289    | 0.810 | 289 | PICI   | 2.1  | 17.4 | <i>rpsD</i>           |
| spf:SpyM51773             | 288    | 0.741 | 290 | PICI   | 1.8  | 11.9 | <i>mutS/L</i>         |
| spy:SPy_2135              | 285    | 0.718 | 287 | PICI   | 1.8  | 12.9 | <i>mutS/L</i>         |

| Gene                      | length | sim   | OL  | insert | site | size | site       |
|---------------------------|--------|-------|-----|--------|------|------|------------|
| stz:SPYALAB49_001801      | 285    | 0.718 | 287 | PICI   | 1.8  | 14.3 | mutS/L     |
| spa:M6_Spy1816            | 285    | 0.718 | 287 | PICI   | 1.8  | 13.3 | mutS/L     |
| sak:SAK_2084              | 285    | 0.725 | 287 | PICI   | 2.1  | 15.6 | rpsD       |
|                           |        |       |     |        |      |      |            |
| snb:SP670_0008 (492 a.a.) |        |       |     |        |      |      | <i>rep</i> |
| spf:SpyM51774             | 500    | 0.915 | 492 | PICI   | 1.8  | 11.9 | mutS/L     |
| spv:SPH_0300              | 489    | 0.918 | 488 | PICI   | 0.26 | 12.4 | uvrA       |
| snc:HMPREF0837_10498      | 489    | 0.916 | 488 | PICI   | 0.44 | 15.4 | uvrA       |
| snd:MY_0268               | 489    | 0.916 | 488 | PICI   | 0.26 | 12.4 | uvrA       |
| snt:SPT_0233              | 489    | 0.916 | 488 | PICI   | 0.2  | 12.4 | uvrA       |
| spnn:T308_00910           | 489    | 0.916 | 488 | PICI   | 1.6  | 12.4 | uvrA       |
| sagi:MSA_22020            | 498    | 0.897 | 485 | PICI   | 2.1  | 17.4 | rpsD       |
| sak:SAK_2083              | 480    | 0.900 | 480 | PICI   | 2.1  | 15.6 | rpsD       |
| sthe:T303_05075           | 501    | 0.758 | 483 | PICI   | 0.93 | 7.7  | dltD       |
| stc:str0775               | 500    | 0.754 | 483 | PICI   | 0.73 | 8.1  | pabB       |
| ste:STER_0819             | 501    | 0.754 | 483 | PICI   | 0.74 | 9.4  | pabB       |
| stn:STND_0765             | 501    | 0.754 | 483 | PICI   | 0.75 | 10.2 | uvrA       |
| ssui:T15_1593             | 507    | 0.484 | 494 | PICI   | 1.60 | 10   | fabG       |
| spi:MGAS10750_Spy1910     | 498    | 0.474 | 485 | PICI   | 1.87 | 13.5 | mutS/L     |
|                           |        |       |     |        |      |      |            |
| Snb:SP670_0007 (167aa)    |        |       |     |        |      |      |            |
| snc:HMPREF0837_10500      | 176    | 0.889 | 162 | PICI   | 0.44 | 15.4 | uvrA       |
| snd:MY_0270               | 176    | 0.889 | 162 | PICI   | 0.26 | 12.4 | uvrA       |
| snt:SPT_0235              | 176    | 0.889 | 162 | PICI   | 0.2  | 12.4 | uvrA       |
| spnn:T308_00920           | 176    | 0.889 | 162 | PICI   | 1.6  | 12.4 | uvrA       |
| spv:SPH_0302              | 176    | 0.889 | 162 | PICI   | 0.25 |      | uvrA       |
| snu:SPNA45_01874          | 142    | 0.923 | 142 | PICI   | 1.88 |      | yesMN      |
| smb:smi_2003              | 153    | 0.865 | 141 | PICI   | 2.05 |      | fucosidase |
| ssq:SSUD9_2176            | 204    | 0.529 | 172 | PICI   | 2.16 |      | recF       |
| sn:SSUST3_2003            | 182    | 0.529 | 172 | PICI   | 2.00 |      | recF       |
| sagi:MSA_21990            | 231    | 0.537 | 164 | PICI   | 2.05 |      | rpsD       |
| ssuy:YB51_9925            | 150    | 0.500 | 148 | PICI   | 2.02 |      | recF       |
| sub:SUB1829               | 205    | 0.426 | 162 | PICI   | 2.01 |      | rpsD       |
|                           |        |       |     |        |      |      |            |
| Snb:SP670_0006 (167aa)    |        |       |     |        |      |      |            |
| snu:SPNA45_01875          | 167    | 1.000 | 167 | PICI   | 1.88 |      | yesMN      |
| smb:smi_2002              | 167    | 0.934 | 167 | PICI   | 2.05 |      | fucosidase |
| snc:HMPREF0837_10501      | 169    | 0.879 | 165 | PICI   | 0.44 |      | uvrA       |
| spnn:T308_00925           | 169    | 0.879 | 165 | PICI   | 1.6  |      | uvrA       |
| spv:SPH_0303              | 169    | 0.879 | 165 | PICI   | 0.25 |      | uvrA       |
| sagi:MSA_21980            | 163    | 0.722 | 162 | PICI   | 2.05 |      | rpsD       |
| ssui:T15_1595             | 166    | 0.548 | 166 | PICI   | 1.60 | 10   | fabG       |
| sagm:BSA_21300            | 162    | 0.525 | 162 | PICI   | 2.08 | 14.6 | rpsD       |
| sak:SAK_2081              | 162    | 0.519 | 162 | PICI   | 2.07 | 15.7 | rpsD       |
| spa:M6_Spy1821            | 162    | 0.512 | 162 | NI     |      |      |            |

| Gene                   | length | sim   | OL  | insert | site | size | site            |
|------------------------|--------|-------|-----|--------|------|------|-----------------|
| Snb:SP670_0005 (130aa) |        |       |     |        |      |      |                 |
| smb:smi_2000           | 130    | 0.946 | 130 | PICI   | 0.19 | 12.4 | <i>mmmN</i>     |
| std:SPPN_01285         | 140    | 0.311 | 132 | PICI?  | 1.94 | 12.6 | very poor annot |
| slu:KE3_2016           | 140    | 0.311 | 132 | PICI   | 1.94 | 14.1 | pgp             |
| sga:GALLO_2136         | 140    | 0.303 | 132 | PICI   | 2.23 | 11.4 |                 |
| sgg:SGGBAA2069_c21340  | 140    | 0.303 | 132 | PICI   | 2.18 | 11.8 |                 |
| sgt:SGGB_2119          | 140    | 0.303 | 132 | PICI   | 2.18 | 11.2 |                 |
| lsa:LSA0600            | 113    | 0.350 | 80  | PICI   | 0.60 | 8.1  |                 |

snb:SP670\_0004 (52 a.a.) no matching protein in DB
